# Supplementary material for: Halogen-Dependent Diversity and Weak Interactions in the Heterometallic Ni/Cd Complex Solids: Structural and Theoretical Investigation
Source: MDPI journal article supplement (doi:10.3390/molecules28227652), 2023-11-18
Supplement: s1 [file s1]

## **Halogen-Dependent Diversity and Weak Interactions in the Heterometallic Ni/Cd Complex Solids: Structural and Theoretical Investigation**

*Oksana V. Nesterova*<sup>1\*</sup>, *Svitlana R. Petrusenko*<sup>2,3</sup>, *Brian W. Skelton*<sup>4</sup>, and *Dmytro S. Nesterov*<sup>1</sup>

<sup>1</sup> *Centro de Química Estrutural, Institute of Molecular Sciences, Instituto Superior Técnico, Universidade de Lisboa, Av. Rovisco Pais, 1049-001, Lisbon, Portugal*

<sup>2</sup> *Department of Chemistry, Taras Shevchenko National University of Kyiv, 64/13 Volodymyrska str., Kyiv 01601, Ukraine*

<sup>3</sup> *Department of Inorganic Chemistry and Technology, Jožef Stefan Institute, Jamova 39, SI-1000 Ljubljana, Slovenia*

<sup>4</sup> *School of Molecular Sciences, M310, University of Western Australia, 35 Stirling Hwy, Perth, WA 6009, Australia*

\* Correspondence: [oksana.nesterova@tecnico.ulisboa.pt](mailto:oksana.nesterova@tecnico.ulisboa.pt)

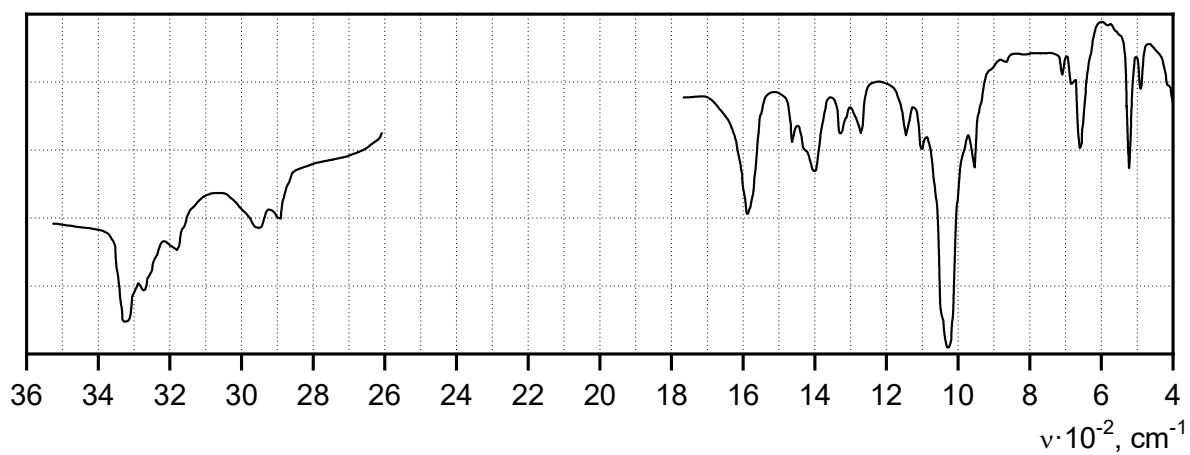

**Figure S1.** IR spectrum of  $[\text{Ni}(\text{en})_3][\text{CdCl}_4] \cdot 3\text{dmso}$  (**1**).

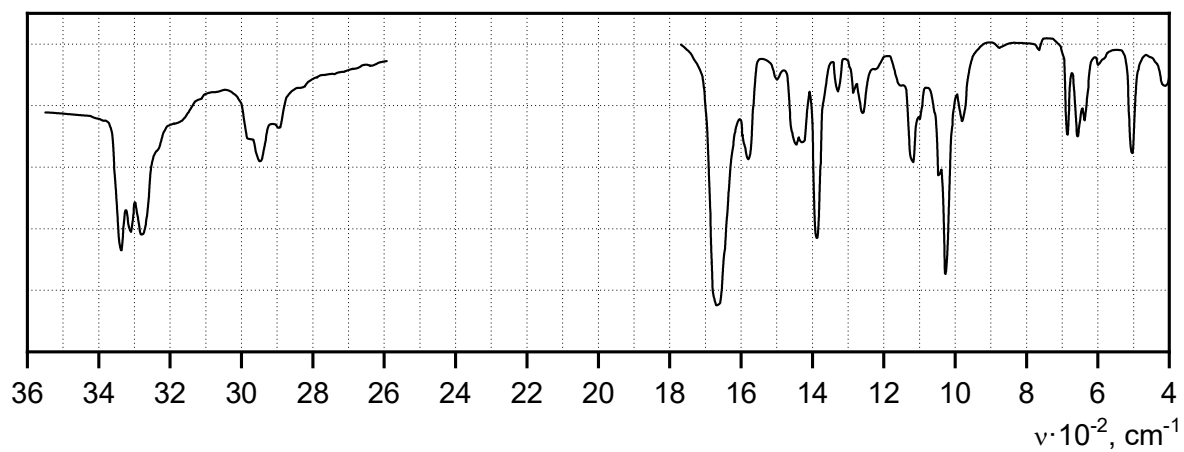

**Figure S2.** IR spectrum of  $[\text{Ni}(\text{en})_2(\text{dmf})_2][\text{CdBr}_4]$  (**2**).

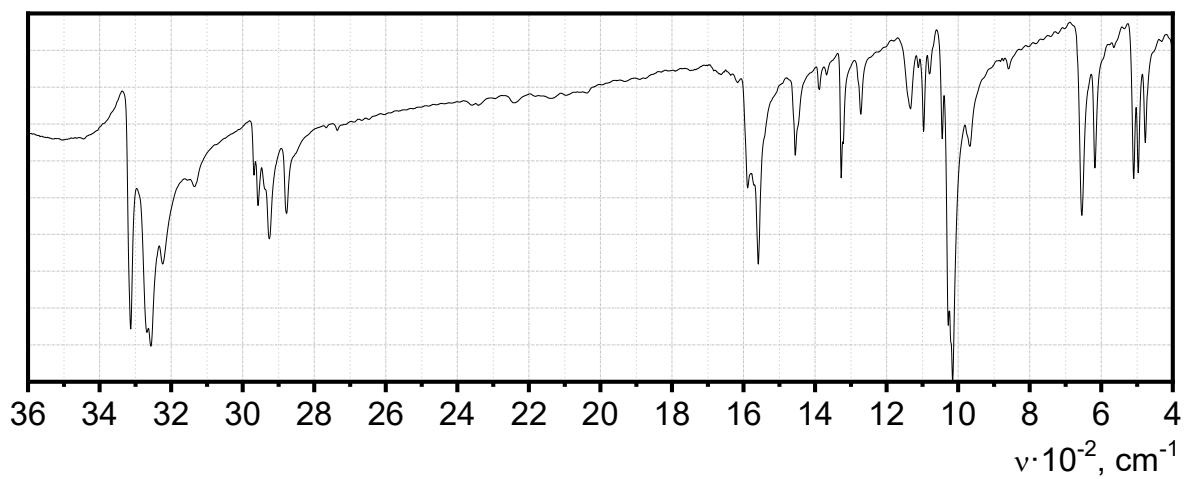

**Figure S3.** IR spectrum of  $[\text{Ni}(\text{en})_3]_2[\text{CdI}_4](\text{I})_2$  (**3**).

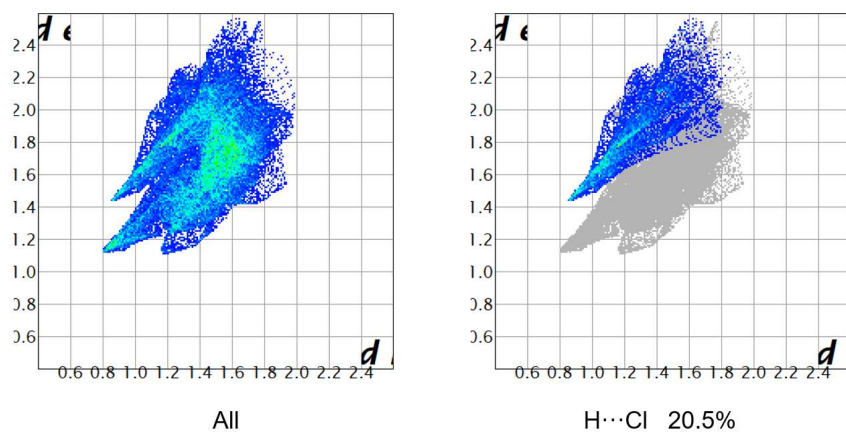

**Figure S4.** The selected fingerprint plots ( $d_e$  vs.  $d_i$ , Å) for  $[\text{Ni}(\text{en})_3]^{2+}$  cation in 1.

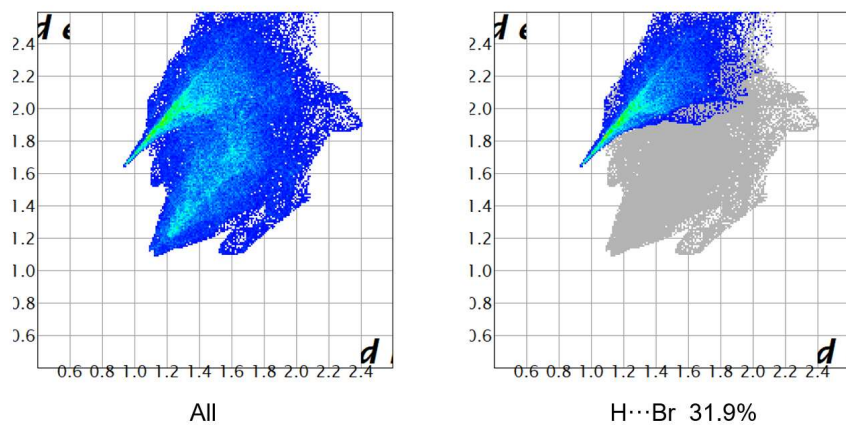

**Figure S5.** The selected fingerprint plots ( $d_e$  vs.  $d_i$ , Å) for  $[\text{Ni}(\text{en})_2(\text{dmf})_2]^{2+}$  cation in 2.

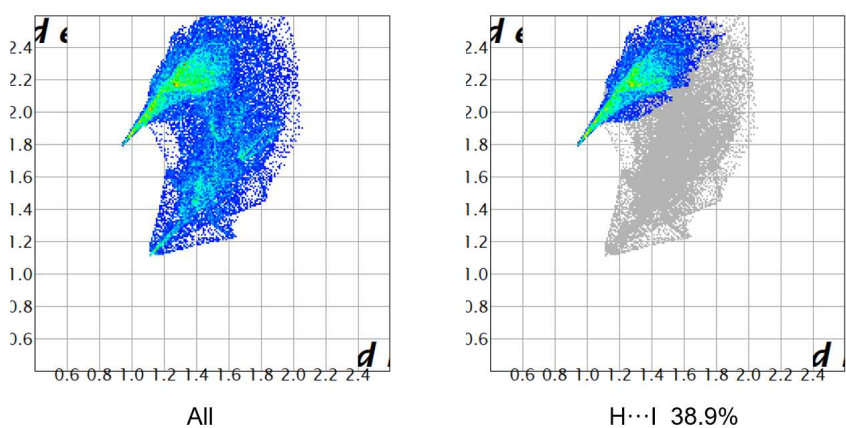

**Figure S6.** The selected fingerprint plots ( $d_e$  vs.  $d_i$ , Å) for  $[\text{Ni}(\text{en})_3]^{2+}$  cation in 3.

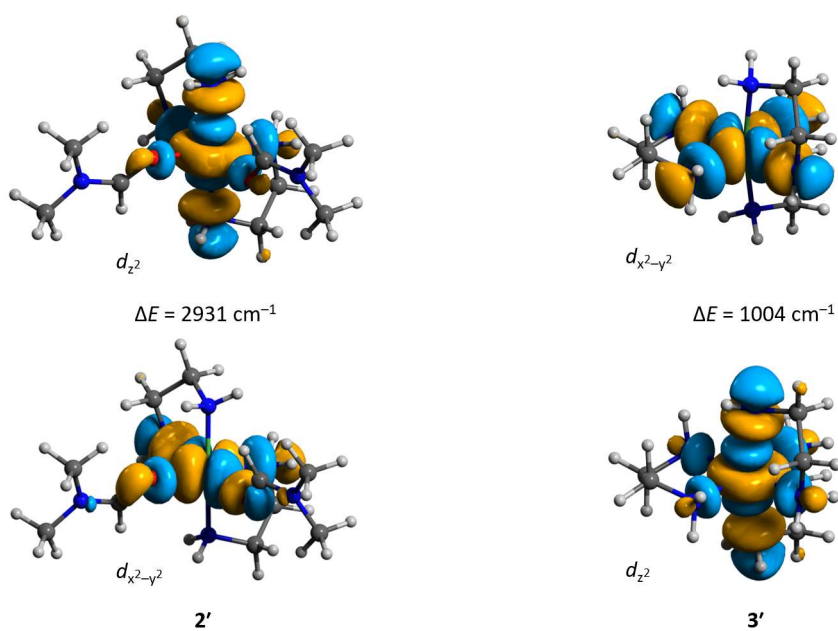

**Figure S7.** Isosurfaces of the singly occupied molecular orbitals (SOMOs) for **2'** (left) and **3'** (right) showing the energy gaps, calculated at the open-shell spin restricted PBE0/ZORA-def2-TZVPP level.

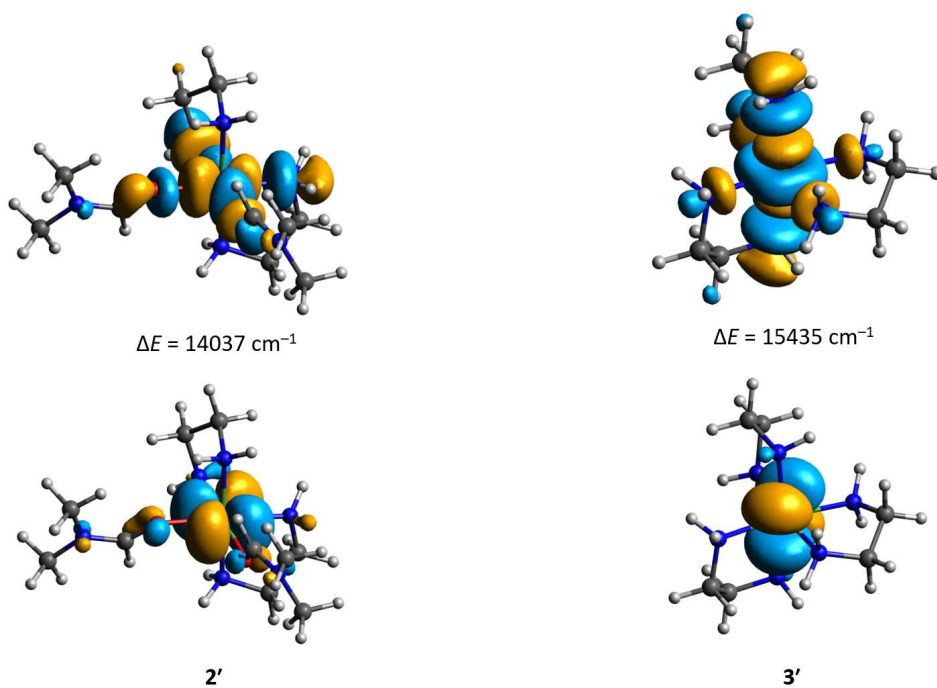

**Figure S8.** Isosurfaces of the natural transition orbitals (NTOs) for **2'** (top) and **3'** (bottom) involved into the first excited state transitions (100% contribution for **2'** and 80% for **3'**), calculated at the TDDFT PBE0/ZORA-def2-TZVPP level.

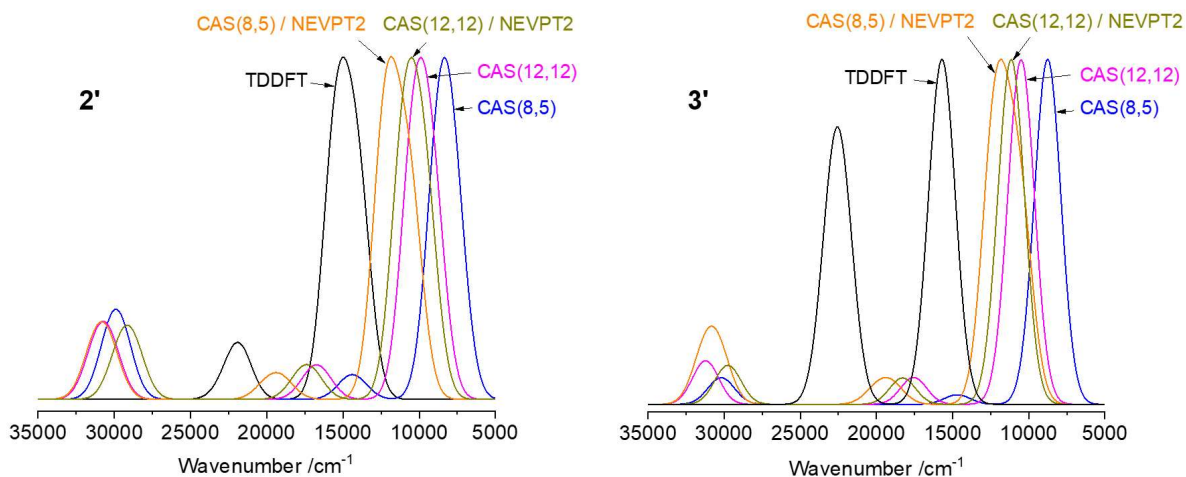

**Figure S9.** Fragments of the absorption spectra for **2'** (left) and **3'** (right) calculated at different levels of theory. The theoretical curves were obtained by the Gaussian broadening of the discrete transitions.

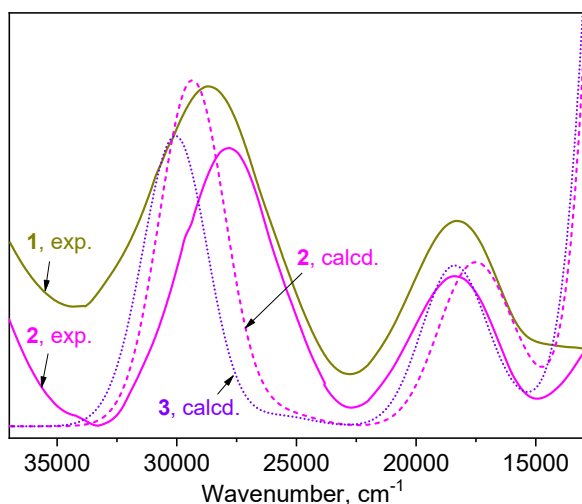

**Figure S10.** Experimental diffuse reflectance Vis spectra of **1** and **2** along with the theoretical ones for **2'** and **3'** calculated at the CAS(12,12)/NEVPT2 level. The theoretical curves were obtained by the Gaussian broadening of the discrete transitions.

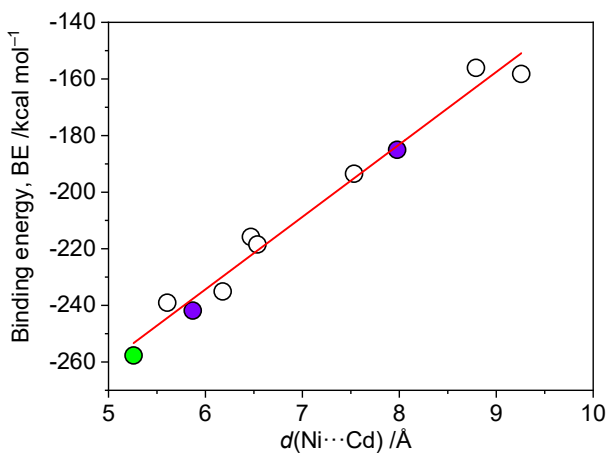

**Figure S11.** Dependence of the binding energy (BE) on the distance between the nickel and cadmium centres in the  $\{\text{Ni}\}^{2+}\{\text{Cd}\}^{2-}$  supramolecular assembly (Table S5), where  $\{\text{Cd}\}^{2-}$  stands for  $[\text{CdCl}_4]^{2-}$  (green circle),  $[\text{CdI}_4]^{2-}$  (violet circles) and  $[\text{CdBr}_4]^{2-}$  (empty circles). Solid red line is a linear fit of these data.

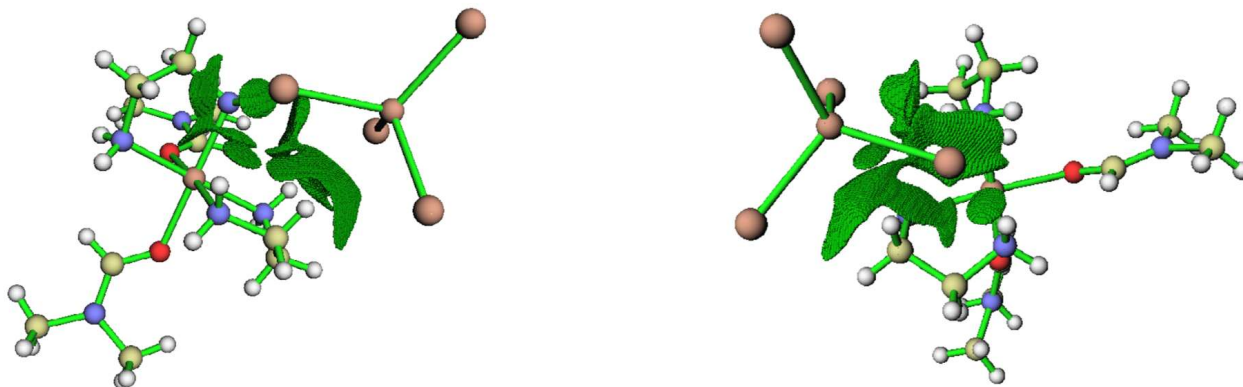

**Figure S12.** Non-covalent interactions domain calculated using the reduced density gradient in the  $\{[\text{Ni}(\text{en})_2(\text{dmf})_2]^{2+} \cdots [\text{CdBr}_4]^{2-}\}$  assembly in **2**, where the symmetry operation for the cadmium centre is  $x, 1 + y, z$ . Left and right pictures show the same structure from different sides.

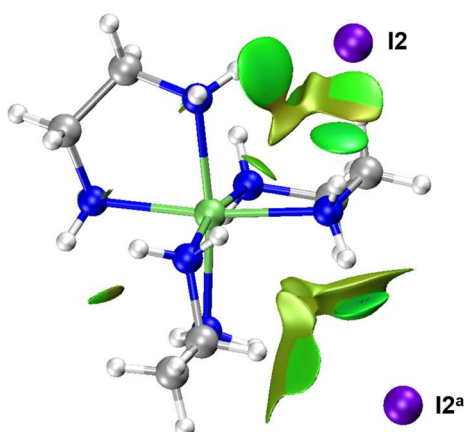

**Figure S13.** 3D isosurface of the RDG (isovalue of 0.5) illustrating non-covalent interactions in  $\{\text{I} \cdots [\text{Ni}(\text{en})_3] \cdots \text{I}^a\}$  fragment ( $^a = 1 + y, 1 - x, 1 - z$ ).

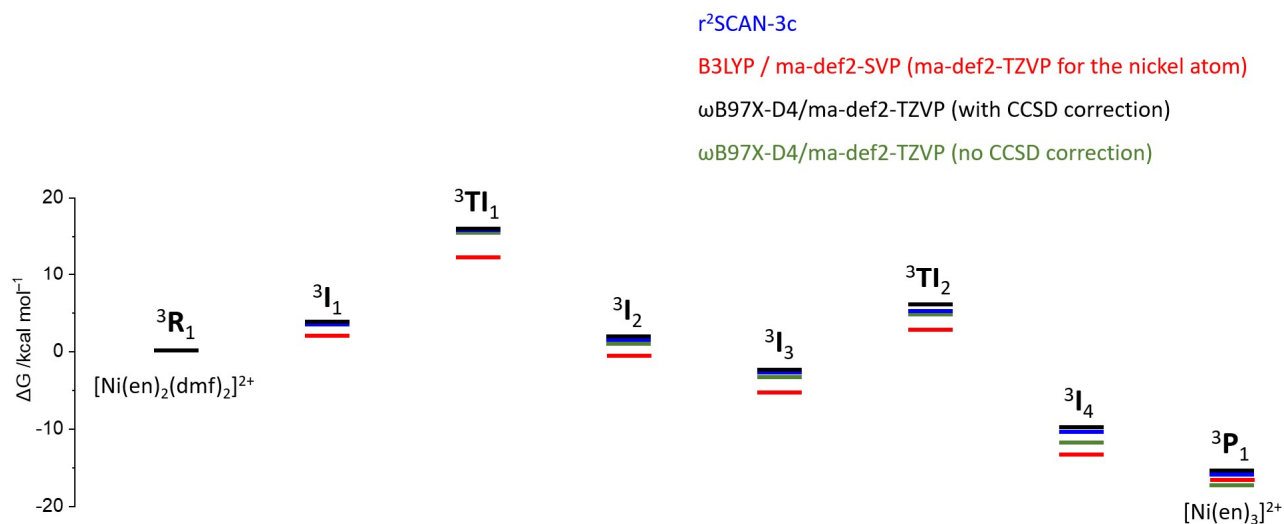

**Figure S14.** Free energy profiles of a reaction pathway for the ligand substitution in  $[\text{Ni}(\text{en})_3(\text{dmf})_2]^{2+}$  ( $^3\text{R}_1$ ) with formation of  $[\text{Ni}(\text{en})_3]^{2+}$  ( $^3\text{P}_1$ ), calculated at the indicated levels of theory and involving the C-PCM dmf solvation model.

**Table S1.** Selected geometrical parameters (distances/Å and angles/°) for **1**.

|                              |          |             |            |
|------------------------------|----------|-------------|------------|
| Ni1–Ni12                     | 2.066(9) | Cd1–Cl1     | 2.426(2)   |
| Ni1–Ni11                     | 2.084(9) | Cd1–Cl2     | 2.439(2)   |
| Ni1–Ni21                     | 2.103(9) | Cd1–Cl3     | 2.4430(18) |
| Ni1–Ni22                     | 2.148(9) |             |            |
| Ni1–Ni12'                    | 2.156(9) |             |            |
| Ni1–Ni11'                    | 2.183(9) |             |            |
| Ni12'–Ni1–Ni12               | 107.7(5) | Cl1–Cd1–Cl2 | 113.83(8)  |
| Ni12'–Ni1–Ni11               | 133.3(4) | Cl1–Cd1–Cl3 | 107.68(6)  |
| Ni12–Ni1–Ni11                | 83.4(4)  | Cl2–Cd1–Cl3 | 108.97(5)  |
| Ni21–Ni1–Ni22                | 81.8(3)  |             |            |
| Ni22–Ni1–Ni12' <sup>1</sup>  | 115.0(3) |             |            |
| Ni21–Ni1–Ni12'               | 168.9(4) |             |            |
| Ni22–Ni1–Ni12'               | 90.9(4)  |             |            |
| Ni21–Ni1–Ni11'               | 92.1(4)  |             |            |
| Ni22–Ni1–Ni11'               | 89.2(3)  |             |            |
| Ni12'–Ni1–Ni11'              | 130.3(4) |             |            |
| Ni12'–Ni1–Ni11'              | 79.4(4)  |             |            |
| Ni11'–Ni1–Ni11' <sup>1</sup> | 115.6(5) |             |            |

Symmetry transformation used to generate equivalent atoms: <sup>1</sup> x, –y+1/2, z.

**Table S2.** Selected geometrical parameters (distances/Å and angles/°) for **2**.

|             |            |             |             |
|-------------|------------|-------------|-------------|
| Ni1–O3      | 2.082(3)   | Cd1–Br4     | 2.5595(6)   |
| Ni1–N21     | 2.092(3)   | Cd1–Br2     | 2.5950(6)   |
| Ni1–O4      | 2.095(3)   | Cd1–Br1     | 2.5950(6)   |
| Ni1–N22     | 2.097(4)   | Cd1–Br3     | 2.6207(5)   |
| Ni1–N11     | 2.108(3)   |             |             |
| Ni1–N12     | 2.109(3)   |             |             |
| O3–Ni1–N21  | 84.19(14)  | Br4–Cd1–Br2 | 108.40(2)   |
| O3–Ni1–O4   | 90.34(13)  | Br4–Cd1–Br1 | 113.651(18) |
| N21–Ni1–O4  | 95.89(13)  | Br2–Cd1–Br1 | 111.197(19) |
| O3–Ni1–N22  | 89.63(14)  | Br4–Cd1–Br3 | 112.33(2)   |
| N21–Ni1–N22 | 83.59(14)  | Br2–Cd1–Br3 | 102.160(18) |
| O4–Ni1–N22  | 179.48(14) | Br1–Cd1–Br3 | 108.521(18) |
| O3–Ni1–N11  | 97.59(13)  |             |             |
| N21–Ni1–N11 | 177.99(14) |             |             |
| O4–Ni1–N11  | 85.06(13)  |             |             |
| N22–Ni1–N11 | 95.46(14)  |             |             |
| O3–Ni1–N12  | 175.59(14) |             |             |
| N21–Ni1–N12 | 95.62(14)  |             |             |
| O4–Ni1–N12  | 85.29(14)  |             |             |
| N22–Ni1–N12 | 94.72(14)  |             |             |
| N11–Ni1–N12 | 82.68(14)  |             |             |



**Table S3.** Selected geometrical parameters (distances/Å and angles/°) for **3**.

|                         |            |                         |             |
|-------------------------|------------|-------------------------|-------------|
| Ni1–N2                  | 2.115(2)   | Cd1–I1                  | 2.7975(2)   |
| Ni1–N3                  | 2.125(2)   |                         |             |
| Ni1–N1                  | 2.149(3)   |                         |             |
| N2–Ni1–N2 <sup>3</sup>  | 95.59(13)  | I1 <sup>1</sup> –Cd1–I1 | 109.142(5)  |
| N2–Ni1–N3 <sup>3</sup>  | 172.07(10) | I1 <sup>2</sup> –Cd1–I1 | 110.132(10) |
| N2–Ni1–N3               | 91.49(9)   |                         |             |
| N3 <sup>3</sup> –Ni1–N3 | 81.67(13)  |                         |             |
| N2–Ni1–N1 <sup>3</sup>  | 90.93(10)  |                         |             |
| N3–Ni1–N1 <sup>3</sup>  | 94.35(10)  |                         |             |
| N2–Ni1–N1               | 82.01(10)  |                         |             |
| N3–Ni1–N1               | 93.57(10)  |                         |             |
| N1 <sup>3</sup> –Ni1–N1 | 169.52(13) |                         |             |

Symmetry transformations used to generate equivalent atoms: <sup>1</sup> 1/2–y, x–1/2, 3/2–z; <sup>2</sup> 1–x, –y, z; <sup>3</sup> x, 1/2–y, 5/4–z.

**Table S4.** Hydrogen bonding distances (Å) and angles (°) for complexes **1a–3**.

| D–H...A                      | D–H  | H...A | D...A     | D–H...A |
|------------------------------|------|-------|-----------|---------|
| <b>1a</b>                    |      |       |           |         |
| N11–H11A...O4 <sup>1</sup>   | 0.91 | 2.02  | 2.905(12) | 164.3   |
| N11–H11B...Cl3               | 0.91 | 2.62  | 3.456(10) | 153.6   |
| N11'–H11C...Cl3              | 0.91 | 2.39  | 3.257(9)  | 159.3   |
| N11'–H11D...O3 <sup>2</sup>  | 0.91 | 2.04  | 2.930(10) | 164.7   |
| N12–H12E...O3 <sup>2</sup>   | 0.91 | 2.29  | 3.135(10) | 154.0   |
| N12–H12F...Cl2 <sup>2</sup>  | 0.91 | 2.81  | 3.658(9)  | 155.2   |
| N12'–H12G...Cl2 <sup>3</sup> | 0.91 | 2.45  | 3.344(10) | 166.1   |
| N12'–H12H...O4 <sup>4</sup>  | 0.91 | 2.11  | 2.987(12) | 161.9   |
| N21–H21A...Cl1               | 0.91 | 2.74  | 3.521(9)  | 144.8   |
| N21–H21B...O3 <sup>3</sup>   | 0.91 | 2.10  | 2.981(10) | 161.6   |
| N22–H22D...O3 <sup>2</sup>   | 0.91 | 2.05  | 2.920(11) | 158.9   |
| <b>2</b>                     |      |       |           |         |
| N11–H11A...Br1 <sup>1</sup>  | 0.91 | 2.91  | 3.742(4)  | 152.4   |
| N11–H11B...Br1 <sup>2</sup>  | 0.91 | 2.81  | 3.645(4)  | 153.0   |
| N12–H12C...Br3 <sup>2</sup>  | 0.91 | 2.81  | 3.616(4)  | 149.1   |
| N21–H21B...Br2 <sup>3</sup>  | 0.91 | 2.68  | 3.583(4)  | 171.8   |
| N22–H22C...Br3 <sup>2</sup>  | 0.91 | 2.71  | 3.570(4)  | 158.2   |
| N22–H22D...Br4 <sup>4</sup>  | 0.91 | 2.70  | 3.529(4)  | 152.4   |
| <b>3</b>                     |      |       |           |         |
| N1–H1A...I1 <sup>1</sup>     | 0.91 | 3.21  | 3.972     | 142.3   |
| N1–H1B...I1                  | 0.91 | 2.93  | 3.775(3)  | 154.8   |
| N2–H2A...I2                  | 0.91 | 2.91  | 3.728(2)  | 150.8   |
| N2–H2B...I2 <sup>1</sup>     | 0.91 | 2.84  | 3.708(2)  | 160.3   |
| N3–H3A...I1 <sup>2</sup>     | 0.91 | 3.07  | 3.875     | 149.3   |

Symmetry transformations used to generate equivalent atoms: **1a** <sup>1</sup> 1–x, 1–y, –z; <sup>2</sup> 1/2+x, y, 1/2–z; <sup>3</sup> 1/2+x, 1/2–y, 1/2–z; <sup>4</sup> 1–x, –1/2+y, –z; **2** <sup>1</sup> 1–x, 1–y, 1–z; <sup>2</sup> x, y+1,z; <sup>3</sup> 2–x, 1–y, 1–z; <sup>4</sup> 3/2–x, y+1/2, 3/2–z; **3** <sup>1</sup> 1+y, –1/2+x, 1/4+z; <sup>2</sup> 1/2–y, 1–x, –1/4+z.

**Table S5.** Binding energies of the selected blocks in 1–3 calculated at the  $\omega$ B97X-D4/ma-def2-QZVPP level.

| Complex  | Components                                              |                                    | Symmetry operation for B      | Separation                    |             | Binding energy /kcal mol <sup>-1</sup> |
|----------|---------------------------------------------------------|------------------------------------|-------------------------------|-------------------------------|-------------|----------------------------------------|
|          | A                                                       | B                                  |                               | Type                          | Distance /Å |                                        |
| <b>1</b> | [Ni(en) <sub>3</sub> ] <sup>2+</sup> <sup>a</sup>       | [CdCl <sub>4</sub> ] <sup>2-</sup> | $x, y, z^b$                   | $d(\text{Ni}\cdots\text{Cd})$ | 5.259       | -257.70                                |
|          | [Ni(en) <sub>3</sub> ] <sup>2+</sup> <sup>a</sup>       | dmsO                               | $1 - x, y - 0.5, -z^c$        | $d(\text{Ni}\cdots\text{O})$  | 4.033       | -33.45                                 |
|          | [Ni(en) <sub>3</sub> ] <sup>2+</sup> <sup>a</sup>       | dmsO                               | $0.5 + x, y, 0.5 - z^c$       | $d(\text{Ni}\cdots\text{O})$  | 3.962       | -33.47                                 |
|          | [Ni(en) <sub>3</sub> ] <sup>2+</sup> <sup>d</sup>       | [CdCl <sub>4</sub> ] <sup>2-</sup> | $x, y, z^b$                   | $d(\text{Ni}\cdots\text{Cd})$ | 5.529       | -257.70                                |
|          | [Ni(en) <sub>3</sub> ] <sup>2+</sup> <sup>d</sup>       | dmsO                               | $1 - x, y - 0.5, -z^c$        | $d(\text{Ni}\cdots\text{O})$  | 4.033       | -28.86                                 |
|          | [Ni(en) <sub>3</sub> ] <sup>2+</sup> <sup>d</sup>       | dmsO                               | $0.5 + x, y, 0.5 - z^c$       | $d(\text{Ni}\cdots\text{O})$  | 3.962       | -33.45                                 |
| <b>2</b> | [Ni(en) <sub>2</sub> (dmf) <sub>2</sub> ] <sup>2+</sup> | [CdBr <sub>4</sub> ] <sup>2-</sup> | $x, y, z^b$                   | $d(\text{Ni}\cdots\text{Cd})$ | 6.469       | -215.81                                |
|          | [Ni(en) <sub>2</sub> (dmf) <sub>2</sub> ] <sup>2+</sup> | [CdBr <sub>4</sub> ] <sup>2-</sup> | $x - 0.5, 1.5 - y, z - 0.5^b$ | $d(\text{Ni}\cdots\text{Cd})$ | 8.791       | -156.09                                |
|          | [Ni(en) <sub>2</sub> (dmf) <sub>2</sub> ] <sup>2+</sup> | [CdBr <sub>4</sub> ] <sup>2-</sup> | $x, 1 + y, z^b$               | $d(\text{Ni}\cdots\text{Cd})$ | 5.606       | -239.04                                |
|          | [Ni(en) <sub>2</sub> (dmf) <sub>2</sub> ] <sup>2+</sup> | [CdBr <sub>4</sub> ] <sup>2-</sup> | $2 - x, 1 - y, 1 - z^b$       | $d(\text{Ni}\cdots\text{Cd})$ | 6.178       | -235.09                                |
|          | [Ni(en) <sub>2</sub> (dmf) <sub>2</sub> ] <sup>2+</sup> | [CdBr <sub>4</sub> ] <sup>2-</sup> | $1 - x, 1 - y, 1 - z^b$       | $d(\text{Ni}\cdots\text{Cd})$ | 7.533       | -193.47                                |
|          | [Ni(en) <sub>2</sub> (dmf) <sub>2</sub> ] <sup>2+</sup> | [CdBr <sub>4</sub> ] <sup>2-</sup> | $x - 0.5, 0.5 - y, z - 0.5^b$ | $d(\text{Ni}\cdots\text{Cd})$ | 9.258       | -158.22                                |
|          | [Ni(en) <sub>2</sub> (dmf) <sub>2</sub> ] <sup>2+</sup> | [CdBr <sub>4</sub> ] <sup>2-</sup> | $1.5 - x, 0.5 + y, 1.5 - z^b$ | $d(\text{Ni}\cdots\text{Cd})$ | 6.536       | -218.47                                |
| <b>3</b> | [Ni(en) <sub>3</sub> ] <sup>2+</sup>                    | [CdI <sub>4</sub> ] <sup>2-</sup>  | $x, y, z^b$                   | $d(\text{Ni}\cdots\text{Cd})$ | 5.869       | -241.85                                |
|          | [Ni(en) <sub>3</sub> ] <sup>2+</sup>                    | [CdI <sub>4</sub> ] <sup>2-</sup>  | $1 - y, x, 1 - z^b$           | $d(\text{Ni}\cdots\text{Cd})$ | 7.978       | -185.02                                |
|          | [Ni(en) <sub>3</sub> ] <sup>2+</sup>                    | I <sup>-</sup>                     | $x, y, z^e$                   | $d(\text{Ni}\cdots\text{I})$  | 4.725       | -145.84                                |
|          | [Ni(en) <sub>3</sub> ] <sup>2+</sup>                    | I <sup>-</sup>                     | $1 + y, 1 - x, 1 - z^e$       | $d(\text{Ni}\cdots\text{I})$  | 4.782       | -149.60                                |

<sup>a</sup> First disordered component; <sup>b</sup> symmetry operation for the central cadmium atom of the [CdHal<sub>4</sub>]<sup>2-</sup> anion; <sup>c</sup> symmetry operation for the dmsO molecule; <sup>d</sup> second disordered component; <sup>e</sup> symmetry operation for the iodine atom.

**Table S6.** Gibbs free energies (Hartree) of the molecular fragments involved in the <sup>3</sup>R<sub>1</sub> → <sup>3</sup>P<sub>1</sub> reaction.<sup>a</sup>

|                                                                                       | $\omega$ B97X-D4 <sup>b</sup> | $\omega$ B97X-D4 <sup>b</sup> / CCSD <sup>c</sup> | B3LYP <sup>d</sup> | r <sup>2</sup> SCAN-3c |
|---------------------------------------------------------------------------------------|-------------------------------|---------------------------------------------------|--------------------|------------------------|
| dmf                                                                                   | -248.6408964                  | -248.050007                                       | -248.1479228       | -248.389304            |
| en                                                                                    | -190.6101744                  | -190.1389362                                      | -190.2099297       | -190.3926915           |
| <sup>3</sup> R <sub>1</sub> , [Ni(en) <sub>2</sub> (dmf) <sub>2</sub> ] <sup>2+</sup> | -2386.62267                   | -2383.746161                                      | -2384.809812       | -2385.718158           |
| <sup>3</sup> P <sub>1</sub> , [Ni(en) <sub>3</sub> ] <sup>2+</sup>                    | -2079.98239                   | -2077.813309                                      | -2078.754177       | -2079.361367           |
| <sup>3</sup> I <sub>1</sub>                                                           | -2577.20477                   | -2573.876047                                      | -2575.013564       | -2576.102241           |
| <sup>3</sup> TI <sub>1</sub>                                                          | -2577.22832                   | -2573.856077                                      | -2574.996859       | -2576.082169           |
| <sup>3</sup> I <sub>2</sub>                                                           | -2328.597605                  | -2573.879129                                      | -2575.017729       | -2576.10564            |
| <sup>3</sup> I <sub>3</sub>                                                           | -2328.584405                  | -2325.839064                                      | -2326.880673       | -2327.72606            |
| <sup>3</sup> TI <sub>2</sub>                                                          | -2328.611335                  | -2325.825262                                      | -2326.867395       | -2327.713208           |
| <sup>3</sup> I <sub>4</sub>                                                           | -2328.611335                  | -2325.851281                                      | -2326.893631       | -2327.738638           |

<sup>a</sup> Geometries optimized on the same DFT level. C-PCM dmf solvation model was applied in all cases; <sup>b</sup> ma-def2-TZVP basis set; <sup>c</sup> Correction of the electronic energy through the DLPNO-CCSD(T)/ma-def2-TZVPP calculations; <sup>d</sup> ma-def2-TZVP basis set for nickel atom and ma-def2-SVP for all other atoms.

**Table S7.** Maxima of the Gaussian lineshapes of the transitions (Listings S1–S4) calculated at the stated levels.<sup>a</sup>

| Compound | Method            | Wavenumbers /cm <sup>-1</sup> |       |       |
|----------|-------------------|-------------------------------|-------|-------|
| 2'       | CAS(8,5)          | 8343                          | 14413 | 29897 |
|          | CAS(8,5)/NEVPT2   | 11862                         | 19384 | 30821 |
|          | CAS(12,12)        | 9883                          | 16745 | 30733 |
|          | CAS(12,12)/NEVPT2 | 10543                         | 11488 | 29326 |
|          | TD-DFT            | 14985                         | 21982 |       |
| 3'       | CAS(8,5)          | 8739                          | 14765 | 30205 |
|          | CAS(8,5)/NEVPT2   | 11862                         | 19384 | 30821 |
|          | CAS(12,12)        | 10543                         | 17581 | 31217 |
|          | CAS(12,12)/NEVPT2 | 11158                         | 18377 | 30041 |
|          | TD-DFT            | 15689                         | 22595 |       |

<sup>a</sup> the 5000 – 30000 cm<sup>-1</sup> range. The Gaussian lineshapes were calculated using the orca\_mapspc tool from the ORCA package.

## Listings S1. Selected output of the stated-averaged CAS(8,5)/AILFT(SC-NEVPT2) calculation for 2'.

### LOEWDIN REDUCED ACTIVE MOs

```

      83
    -0.37121
    1.60000
-----
0 Ni dz2      92.9
1 N  pz       1.2
7 C  px       0.0
8 H  s        0.0
10 N px       0.3
13 N pz       1.3
19 C py       0.0
21 H s        0.0
22 N py       0.3
25 O py       0.0
28 N py       0.0
37 O px       0.0
40 N px       0.0

      84      85      86      87
    -0.41493 -0.41497 -0.37960 -0.41469
    1.60000  1.60000  1.60000  1.60000
-----
0 Ni s        0.0      0.0      0.0      0.0
0 Ni dxz      98.7      0.0      0.0      0.0
0 Ni dyz       0.0     98.7      0.0      0.0
0 Ni dx2y2     0.0      0.0     93.9      0.0
0 Ni dxy       0.0      0.0      0.0     98.7
12 H s         0.0      0.0      0.0      0.1
24 H s         0.0      0.0      0.0      0.0
44 H s         0.0      0.0      0.0      0.0

```

### CAS-SCF STATES FOR BLOCK 1 MULT=3 NROOTS=10

```

ROOT 0: E= -2399.7422139472 Eh
  0.97263 [ 2]: 12212
  0.01016 [ 3]: 12221
  0.00694 [ 7]: 22112
  0.00427 [ 1]: 12122
  0.00339 [ 5]: 21212
ROOT 1: E= -2399.7071356007 Eh 0.955 eV 7698.8 cm**-1
  0.97924 [ 3]: 12221
  0.00958 [ 2]: 12212
  0.00585 [ 8]: 22121
  0.00272 [ 0]: 11222
ROOT 2: E= -2399.7026033486 Eh 1.078 eV 8693.5 cm**-1
  0.59420 [ 5]: 21212
  0.26308 [ 0]: 11222
  0.10318 [ 7]: 22112
  0.02264 [ 1]: 12122
  0.00549 [ 6]: 21221
  0.00510 [ 4]: 21122
  0.00293 [ 8]: 22121
ROOT 3: E= -2399.7023609626 Eh 1.084 eV 8746.7 cm**-1
  0.58360 [ 7]: 22112
  0.26461 [ 1]: 12122
  0.08940 [ 5]: 21212
  0.02224 [ 0]: 11222
  0.01564 [ 2]: 12212
  0.01374 [ 4]: 21122
  0.00414 [ 8]: 22121
  0.00342 [ 6]: 21221
  0.00320 [ 9]: 22211
ROOT 4: E= -2399.6786666787 Eh 1.729 eV 13947.0 cm**-1
  0.27760 [ 6]: 21221
  0.22288 [ 8]: 22121
  0.16938 [ 1]: 12122
  0.09086 [ 4]: 21122
  0.07928 [ 9]: 22211
  0.07698 [ 0]: 11222
  0.05032 [ 5]: 21212
  0.03227 [ 7]: 22112
ROOT 5: E= -2399.6768843972 Eh 1.778 eV 14338.2 cm**-1
  0.34526 [ 8]: 22121
  0.22027 [ 6]: 21221
  0.20132 [ 0]: 11222

```

```

0.07102 [ 1]: 12122
0.06792 [ 5]: 21212
0.06366 [ 7]: 22112
0.01461 [ 4]: 21122
0.00901 [ 3]: 12221
0.00669 [ 9]: 22211
ROOT 6: E= -2399.6746378096 Eh 1.839 eV 14831.2 cm**-1
0.48603 [ 4]: 21122
0.30058 [ 9]: 22211
0.08636 [ 6]: 21221
0.04683 [ 7]: 22112
0.03530 [ 1]: 12122
0.03342 [ 5]: 21212
0.01124 [ 8]: 22121
ROOT 7: E= -2399.6081033787 Eh 3.649 eV 29433.9 cm**-1
0.30176 [ 1]: 12122
0.25444 [ 6]: 21221
0.11186 [ 7]: 22112
0.09942 [ 9]: 22211
0.08170 [ 4]: 21122
0.06962 [ 0]: 11222
0.06458 [ 8]: 22121
0.01657 [ 5]: 21212
ROOT 8: E= -2399.6076759953 Eh 3.661 eV 29527.7 cm**-1
0.34952 [ 0]: 11222
0.31767 [ 8]: 22121
0.13754 [ 5]: 21212
0.08941 [ 6]: 21221
0.08069 [ 1]: 12122
0.02366 [ 7]: 22112
ROOT 9: E= -2399.6042237223 Eh 3.755 eV 30285.4 cm**-1
0.50964 [ 9]: 22211
0.30702 [ 4]: 21122
0.06093 [ 6]: 21221
0.05014 [ 1]: 12122
0.02768 [ 7]: 22112
0.02546 [ 8]: 22121
0.01197 [ 0]: 11222
0.00714 [ 5]: 21212

```

---

CAS-SCF STATES FOR BLOCK 2 MULT= 1 NROOTS=15

---

```

ROOT 0: E= -2399.6586898562 Eh
0.55024 [ 0]: 02222
0.37721 [ 12]: 22202
0.04173 [ 14]: 22220
0.00570 [ 5]: 20222
0.00552 [ 2]: 12122
0.00441 [ 10]: 22112
0.00440 [ 9]: 22022
0.00351 [ 13]: 22211
0.00278 [ 7]: 21212
0.00265 [ 1]: 11222
ROOT 1: E= -2399.6583750613 Eh 0.009 eV 69.1 cm**-1
0.92794 [ 3]: 12212
0.02674 [ 9]: 22022
0.02442 [ 5]: 20222
0.00942 [ 4]: 12221
0.00383 [ 10]: 22112
0.00257 [ 2]: 12122
ROOT 2: E= -2399.6263898683 Eh 0.879 eV 7089.0 cm**-1
0.85699 [ 4]: 12221
0.11911 [ 6]: 21122
0.00793 [ 3]: 12212
0.00642 [ 10]: 22112
0.00292 [ 1]: 11222
0.00253 [ 2]: 12122
ROOT 3: E= -2399.6224688608 Eh 0.986 eV 7949.6 cm**-1
0.46060 [ 7]: 21212
0.21818 [ 1]: 11222
0.10112 [ 10]: 22112
0.09632 [ 11]: 22121
0.07184 [ 2]: 12122
0.04685 [ 8]: 21221
ROOT 4: E= -2399.6221341056 Eh 0.995 eV 8023.1 cm**-1
0.46274 [ 10]: 22112
0.20449 [ 2]: 12122
0.10829 [ 7]: 21212
0.09354 [ 8]: 21221
0.05361 [ 1]: 11222
0.04421 [ 11]: 22121
0.01369 [ 4]: 12221
0.01233 [ 0]: 02222
0.00303 [ 14]: 22220

```

ROOT 5: E= -2399.6068270586 Eh 1.411 eV 11382.6 cm\*\*-1  
 0.45145 [ 12]: 22202  
 0.29629 [ 0]: 02222  
 0.08055 [ 5]: 20222  
 0.07464 [ 9]: 22022  
 0.04997 [ 14]: 22220  
 0.01611 [ 13]: 22211  
 0.01377 [ 2]: 12122  
 0.01277 [ 1]: 11222  
 0.00342 [ 10]: 22112  
 ROOT 6: E= -2399.5941201959 Eh 1.757 eV 14171.4 cm\*\*-1  
 0.66955 [ 1]: 11222  
 0.29506 [ 7]: 21212  
 0.01203 [ 5]: 20222  
 0.00643 [ 3]: 12212  
 0.00396 [ 0]: 02222  
 0.00301 [ 11]: 22121  
 0.00299 [ 8]: 21221  
 0.00299 [ 2]: 12122  
 ROOT 7: E= -2399.5938077482 Eh 1.766 eV 14240.0 cm\*\*-1  
 0.65697 [ 2]: 12122  
 0.28440 [ 10]: 22112  
 0.02234 [ 9]: 22022  
 0.01020 [ 0]: 02222  
 0.00935 [ 3]: 12212  
 0.00388 [ 8]: 21221  
 0.00386 [ 1]: 11222  
 0.00358 [ 13]: 22211  
 0.00251 [ 11]: 22121  
 ROOT 8: E= -2399.5905978207 Eh 1.853 eV 14944.5 cm\*\*-1  
 0.93742 [ 13]: 22211  
 0.01996 [ 12]: 22202  
 0.01919 [ 14]: 22220  
 0.00796 [ 11]: 22121  
 0.00577 [ 7]: 21212  
 0.00536 [ 10]: 22112  
 0.00374 [ 8]: 21221  
 ROOT 9: E= -2399.5674552535 Eh 2.483 eV 20023.7 cm\*\*-1  
 0.57741 [ 14]: 22220  
 0.22698 [ 5]: 20222  
 0.06717 [ 9]: 20222  
 0.02767 [ 11]: 22121  
 0.02511 [ 8]: 21221  
 0.02400 [ 12]: 22202  
 0.01892 [ 0]: 02222  
 0.01821 [ 13]: 22211  
 0.00539 [ 1]: 11222  
 0.00302 [ 2]: 12122  
 ROOT 10: E= -2399.5665845047 Eh 2.506 eV 20214.8 cm\*\*-1  
 0.51285 [ 9]: 20222  
 0.35423 [ 5]: 20222  
 0.04193 [ 3]: 12212  
 0.02106 [ 8]: 21221  
 0.01962 [ 11]: 22121  
 0.01793 [ 14]: 22220  
 0.01733 [ 2]: 12122  
 0.00789 [ 6]: 21122  
 0.00405 [ 1]: 11222  
 ROOT 11: E= -2399.5644954978 Eh 2.563 eV 20673.3 cm\*\*-1  
 0.51815 [ 6]: 21122  
 0.25377 [ 8]: 21221  
 0.08637 [ 4]: 12221  
 0.07067 [ 11]: 22121  
 0.03227 [ 10]: 22112  
 0.01956 [ 14]: 22220  
 0.01117 [ 5]: 20222  
 ROOT 12: E= -2399.5634853459 Eh 2.591 eV 20895.0 cm\*\*-1  
 0.48321 [ 11]: 22121  
 0.29788 [ 8]: 21221  
 0.09381 [ 7]: 21212  
 0.02495 [ 10]: 22112  
 0.02360 [ 9]: 22022  
 0.02191 [ 5]: 20222  
 0.01632 [ 13]: 22211  
 0.01382 [ 6]: 21122  
 0.00964 [ 2]: 12122  
 0.00820 [ 1]: 11222  
 0.00421 [ 4]: 12221  
 ROOT 13: E= -2399.5630158071 Eh 2.603 eV 20998.0 cm\*\*-1  
 0.33497 [ 6]: 21122  
 0.25055 [ 8]: 21221  
 0.24342 [ 11]: 22121  
 0.06892 [ 10]: 22112  
 0.02845 [ 7]: 21212  
 0.02569 [ 4]: 12221  
 0.01666 [ 1]: 11222

```

0.01546 [ 14]: 22220
0.00647 [ 2]: 12122
0.00510 [ 9]: 22022
ROOT 14: E= -2399.4139401295 Eh 6.660 eV 53716.4 cm**-1
0.26152 [ 9]: 22022
0.26102 [ 5]: 20222
0.25449 [ 14]: 22220
0.11705 [ 12]: 22202
0.10418 [ 0]: 02222

```

---

#### SA-CASSCF TRANSITION ENERGIES

---

LOWEST ROOT (ROOT 0 ,MULT 3) = -2399.742213947 Eh -65300.305 eV

| STATE | ROOT | MULT | DE/a.u.  | DE/eV | DE/cm**-1 |
|-------|------|------|----------|-------|-----------|
| 1:    | 1    | 3    | 0.035078 | 0.955 | 7698.8    |
| 2:    | 2    | 3    | 0.039611 | 1.078 | 8693.5    |
| 3:    | 3    | 3    | 0.039853 | 1.084 | 8746.7    |
| 4:    | 4    | 3    | 0.063547 | 1.729 | 13947.0   |
| 5:    | 5    | 3    | 0.065330 | 1.778 | 14338.2   |
| 6:    | 6    | 3    | 0.067576 | 1.839 | 14831.2   |
| 7:    | 0    | 1    | 0.083524 | 2.273 | 18331.4   |
| 8:    | 1    | 1    | 0.083839 | 2.281 | 18400.5   |
| 9:    | 2    | 1    | 0.115824 | 3.152 | 25420.4   |
| 10:   | 3    | 1    | 0.119745 | 3.258 | 26281.0   |
| 11:   | 4    | 1    | 0.120080 | 3.268 | 26354.5   |
| 12:   | 7    | 3    | 0.134111 | 3.649 | 29433.9   |
| 13:   | 8    | 3    | 0.134538 | 3.661 | 29527.7   |
| 14:   | 5    | 1    | 0.135387 | 3.684 | 29714.0   |
| 15:   | 9    | 3    | 0.137990 | 3.755 | 30285.4   |
| 16:   | 6    | 1    | 0.148094 | 4.030 | 32502.8   |
| 17:   | 7    | 1    | 0.148406 | 4.038 | 32571.4   |
| 18:   | 8    | 1    | 0.151616 | 4.126 | 33275.9   |
| 19:   | 9    | 1    | 0.174759 | 4.755 | 38355.1   |
| 20:   | 10   | 1    | 0.175629 | 4.779 | 38546.2   |
| 21:   | 11   | 1    | 0.177718 | 4.836 | 39004.7   |
| 22:   | 12   | 1    | 0.178729 | 4.863 | 39226.4   |
| 23:   | 13   | 1    | 0.179198 | 4.876 | 39329.4   |
| 24:   | 14   | 1    | 0.328274 | 8.933 | 72047.8   |

---

#### NEVPT2 TRANSITION ENERGIES

---

LOWEST ROOT (ROOT 0 ,MULT 3) = -2403.920989992 Eh -65414.016 eV

| STATE | ROOT | MULT | DE/a.u.  | DE/eV | DE/cm**-1 |
|-------|------|------|----------|-------|-----------|
| 1:    | 1    | 3    | 0.048468 | 1.319 | 10637.6   |
| 2:    | 2    | 3    | 0.055354 | 1.506 | 12148.7   |
| 3:    | 3    | 3    | 0.055641 | 1.514 | 12211.9   |
| 4:    | 0    | 1    | 0.072167 | 1.964 | 15838.7   |
| 5:    | 1    | 1    | 0.072915 | 1.984 | 16003.0   |
| 6:    | 4    | 3    | 0.085662 | 2.331 | 18800.7   |
| 7:    | 5    | 3    | 0.088048 | 2.396 | 19324.4   |
| 8:    | 6    | 3    | 0.091404 | 2.487 | 20060.8   |
| 9:    | 2    | 1    | 0.119615 | 3.255 | 26252.4   |
| 10:   | 5    | 1    | 0.125114 | 3.405 | 27459.4   |
| 11:   | 3    | 1    | 0.125767 | 3.422 | 27602.8   |
| 12:   | 4    | 1    | 0.126069 | 3.431 | 27669.0   |
| 13:   | 7    | 3    | 0.137997 | 3.755 | 30286.9   |
| 14:   | 8    | 3    | 0.138463 | 3.768 | 30389.1   |
| 15:   | 9    | 3    | 0.142565 | 3.879 | 31289.3   |
| 16:   | 6    | 1    | 0.147700 | 4.019 | 32416.5   |
| 17:   | 7    | 1    | 0.148088 | 4.030 | 32501.6   |
| 18:   | 8    | 1    | 0.152150 | 4.140 | 33393.0   |
| 19:   | 9    | 1    | 0.187695 | 5.107 | 41194.3   |
| 20:   | 10   | 1    | 0.189312 | 5.151 | 41549.3   |
| 21:   | 11   | 1    | 0.190550 | 5.185 | 41821.0   |
| 22:   | 12   | 1    | 0.191068 | 5.199 | 41934.7   |
| 23:   | 13   | 1    | 0.191781 | 5.219 | 42091.0   |
| 24:   | 14   | 1    | 0.308742 | 8.401 | 67761.0   |

---

#### Racah Parameters :

---

B = 0.005418194 a.u. = 0.147 eV = 1189.2 cm\*\*-1  
C = 0.017338559 a.u. = 0.472 eV = 3805.4 cm\*\*-1  
C/B = 3.200

---



---

#### The ligand field one electron eigenfunctions:

---

| Orbital | Energy (eV) | Energy(cm-1) | dz2       | dxz       | dyz       | dx2-y2    | dxxy      |
|---------|-------------|--------------|-----------|-----------|-----------|-----------|-----------|
| 1       | 0.000       | 0.0          | 0.089485  | -0.481544 | 0.870846  | 0.032218  | 0.026393  |
| 2       | 0.011       | 92.5         | -0.002289 | 0.859215  | 0.475655  | 0.114344  | -0.149737 |
| 3       | 0.038       | 307.3        | -0.010726 | 0.150588  | 0.057684  | -0.084126 | 0.983262  |
| 4       | 1.180       | 9518.8       | -0.003413 | 0.070490  | 0.078964  | -0.989324 | -0.100110 |
| 5       | 1.344       | 10843.0      | 0.995922  | 0.047106  | -0.076262 | -0.006929 | 0.007531  |

D = -5.662736 cm-1  
E/D = 0.052761

g-factors:  
2.256065 2.258721 2.298415 iso = 2.271067

## Listings S2. Selected output of the stated-averaged CAS(8,5)/AILFT(SC-NEVPT2) calculation for 3'.

### LOEWDIN REDUCED ACTIVE MOs

|            | 60       | 61       | 62       | 63       | 64       |
|------------|----------|----------|----------|----------|----------|
|            | -0.37426 | -0.41433 | -0.41338 | -0.37105 | -0.41316 |
|            | 1.60000  | 1.60000  | 1.60000  | 1.60000  | 1.60000  |
| 0 Ni dz2   | 93.3     | 0.0      | 0.0      | 0.0      | 0.0      |
| 0 Ni dxz   | 0.0      | 98.7     | 0.0      | 0.0      | 0.0      |
| 0 Ni dyz   | 0.0      | 0.0      | 98.6     | 0.0      | 0.0      |
| 0 Ni dx2y2 | 0.0      | 0.0      | 0.0      | 92.9     | 0.0      |
| 0 Ni dxy   | 0.0      | 0.0      | 0.0      | 0.0      | 98.6     |

### CAS-SCF STATES FOR BLOCK 1 MULT= 3 NROOTS=10

```

ROOT 0: E= -2094.6369082146 Eh
  0.94240 [ 2]: 12212
  0.02044 [ 7]: 22112
  0.02019 [ 3]: 12221
  0.00894 [ 1]: 12122
  0.00618 [ 5]: 21212
ROOT 1: E= -2094.5979462650 Eh 1.060 eV 8551.2 cm**-1
  0.43504 [ 7]: 22112
  0.31663 [ 5]: 21212
  0.12431 [ 0]: 11222
  0.09641 [ 1]: 12122
  0.00854 [ 6]: 21221
  0.00628 [ 8]: 22121
  0.00469 [ 4]: 21122
  0.00398 [ 2]: 12212
  0.00258 [ 3]: 12221
ROOT 2: E= -2094.5975790161 Eh 1.070 eV 8631.8 cm**-1
  0.40532 [ 5]: 21212
  0.29070 [ 7]: 22112
  0.12365 [ 1]: 12122
  0.08370 [ 0]: 11222
  0.03772 [ 2]: 12212
  0.02278 [ 4]: 21122
  0.01400 [ 8]: 22121
  0.00832 [ 3]: 12221
  0.00792 [ 6]: 21221
  0.00588 [ 9]: 22211
ROOT 3: E= -2094.5959056035 Eh 1.116 eV 8999.0 cm**-1
  0.93559 [ 3]: 12221
  0.01571 [ 8]: 22121
  0.01519 [ 2]: 12212
  0.01362 [ 0]: 11222
  0.00695 [ 5]: 21212
  0.00641 [ 7]: 22112
  0.00572 [ 6]: 21221
ROOT 4: E= -2094.5700367852 Eh 1.820 eV 14676.6 cm**-1
  0.36684 [ 4]: 21122
  0.30016 [ 9]: 22211
  0.10874 [ 8]: 22121
  0.09655 [ 0]: 11222
  0.05817 [ 6]: 21221
  0.03796 [ 7]: 22112
  0.01912 [ 1]: 12122
  0.00904 [ 3]: 12221
  0.00311 [ 5]: 21212
ROOT 5: E= -2094.5686887112 Eh 1.856 eV 14972.5 cm**-1
  0.35066 [ 8]: 22121
  0.21516 [ 6]: 21221

```



```

0.18108 [ 1]: 12122
0.12751 [ 0]: 11222
0.09171 [ 5]: 21212
0.01674 [ 4]: 21122
0.01279 [ 7]: 22112
ROOT 6: E= -2094.5684780296 Eh 1.862 eV 15018.7 cm**-1
0.29977 [ 6]: 21221
0.16691 [ 4]: 21122
0.12061 [ 1]: 12122
0.11368 [ 9]: 22211
0.10741 [ 8]: 22121
0.09463 [ 0]: 11222
0.05051 [ 7]: 22112
0.02623 [ 5]: 21212
0.02013 [ 3]: 12221
ROOT 7: E= -2094.5004991150 Eh 3.712 eV 29938.3 cm**-1
0.55386 [ 9]: 22211
0.41501 [ 4]: 21122
0.02309 [ 0]: 11222
0.00354 [ 8]: 22121
ROOT 8: E= -2094.4996798176 Eh 3.734 eV 30118.2 cm**-1
0.25608 [ 1]: 12122
0.20633 [ 6]: 21221
0.19159 [ 8]: 22121
0.19080 [ 0]: 11222
0.09840 [ 7]: 22112
0.04811 [ 5]: 21212
0.00833 [ 9]: 22211
ROOT 9: E= -2094.4985117068 Eh 3.766 eV 30374.5 cm**-1
0.24492 [ 0]: 11222
0.20153 [ 8]: 22121
0.19601 [ 6]: 21221
0.19410 [ 1]: 12122
0.09393 [ 5]: 21212
0.04732 [ 7]: 22112
0.01450 [ 9]: 22211
0.00610 [ 4]: 21122

```

---

CAS-SCF STATES FOR BLOCK 2 MULT= 1 NROOTS=15

---

```

ROOT 0: E= -2094.5535332497 Eh
0.49295 [ 12]: 22202
0.41245 [ 0]: 02222
0.03025 [ 14]: 22220
0.01287 [ 2]: 12122
0.01246 [ 13]: 22211
0.01185 [ 10]: 22112
0.01024 [ 9]: 20222
0.00951 [ 5]: 20222
0.00404 [ 1]: 11222
ROOT 1: E= -2094.5533118911 Eh 0.006 eV 48.6 cm**-1
0.90595 [ 3]: 12212
0.02683 [ 9]: 22022
0.02276 [ 5]: 20222
0.01949 [ 4]: 12221
0.01462 [ 10]: 22112
0.00442 [ 7]: 21212
0.00351 [ 2]: 12122
ROOT 2: E= -2094.5176905077 Eh 0.975 eV 7866.6 cm**-1
0.33365 [ 10]: 22112
0.32157 [ 7]: 21212
0.09962 [ 11]: 22121
0.09905 [ 1]: 11222
0.07595 [ 2]: 12122
0.03135 [ 8]: 21221
0.01268 [ 12]: 22202
0.01208 [ 6]: 21122
0.00906 [ 0]: 02222
ROOT 3: E= -2094.5171931782 Eh 0.989 eV 7975.7 cm**-1
0.33737 [ 7]: 21212
0.32189 [ 10]: 22112
0.10751 [ 2]: 12122
0.09631 [ 8]: 21221
0.08274 [ 1]: 11222
0.03207 [ 11]: 22121
0.00915 [ 3]: 12212
0.00383 [ 6]: 21122
0.00289 [ 0]: 02222
ROOT 4: E= -2094.5157322218 Eh 1.029 eV 8296.4 cm**-1
0.83562 [ 4]: 12221
0.12387 [ 6]: 21122
0.01736 [ 3]: 12212
0.01280 [ 11]: 22121
0.00399 [ 7]: 21212

```

ROOT 5: E= -2094.5019597750 Eh 1.403 eV 11319.1 cm\*\*-1  
 0.39921 [ 0]: 02222  
 0.32544 [ 12]: 22202  
 0.07121 [ 14]: 22220  
 0.06087 [ 5]: 20222  
 0.05189 [ 9]: 22022  
 0.03705 [ 2]: 12122  
 0.03224 [ 13]: 22211  
 0.00923 [ 10]: 22112  
 0.00896 [ 1]: 11222  
 0.00297 [ 7]: 21212  
 ROOT 6: E= -2094.4884074819 Eh 1.772 eV 14293.5 cm\*\*-1  
 0.89759 [ 13]: 22211  
 0.04094 [ 12]: 22202  
 0.04041 [ 14]: 22220  
 0.00953 [ 11]: 22121  
 0.00815 [ 7]: 21212  
 ROOT 7: E= -2094.4858908928 Eh 1.841 eV 14845.8 cm\*\*-1  
 0.41259 [ 2]: 12122  
 0.31748 [ 1]: 11222  
 0.11542 [ 7]: 21212  
 0.08045 [ 10]: 22112  
 0.03229 [ 9]: 22022  
 0.02365 [ 3]: 12212  
 0.00635 [ 5]: 20222  
 0.00497 [ 0]: 02222  
 ROOT 8: E= -2094.4855973761 Eh 1.849 eV 14910.2 cm\*\*-1  
 0.41960 [ 1]: 11222  
 0.27015 [ 2]: 12122  
 0.11489 [ 10]: 22112  
 0.09753 [ 7]: 21212  
 0.03606 [ 0]: 02222  
 0.02441 [ 9]: 22022  
 0.00924 [ 6]: 21122  
 0.00781 [ 5]: 20222  
 0.00746 [ 8]: 21221  
 0.00629 [ 4]: 12221  
 0.00296 [ 12]: 22202  
 ROOT 9: E= -2094.4592821765 Eh 2.565 eV 20685.7 cm\*\*-1  
 0.57168 [ 14]: 22220  
 0.16056 [ 9]: 22022  
 0.13747 [ 5]: 20222  
 0.03520 [ 13]: 22211  
 0.02178 [ 0]: 02222  
 0.01931 [ 6]: 21122  
 0.01794 [ 8]: 21221  
 0.01556 [ 12]: 22202  
 0.01075 [ 2]: 12122  
 0.00305 [ 4]: 12221  
 ROOT 10: E= -2094.4587306517 Eh 2.580 eV 20806.8 cm\*\*-1  
 0.45202 [ 5]: 20222  
 0.42907 [ 9]: 22022  
 0.03645 [ 3]: 12212  
 0.02647 [ 2]: 12122  
 0.02077 [ 6]: 21122  
 0.01396 [ 10]: 22112  
 0.00756 [ 8]: 21221  
 0.00511 [ 1]: 11222  
 0.00444 [ 7]: 21212  
 0.00290 [ 11]: 22121  
 ROOT 11: E= -2094.4565457639 Eh 2.639 eV 21286.3 cm\*\*-1  
 0.52537 [ 11]: 22121  
 0.31757 [ 8]: 21221  
 0.09193 [ 7]: 21212  
 0.01804 [ 2]: 12122  
 0.01432 [ 13]: 22211  
 0.01418 [ 1]: 11222  
 0.00657 [ 10]: 22112  
 0.00613 [ 5]: 20222  
 ROOT 12: E= -2094.4557966730 Eh 2.660 eV 21450.7 cm\*\*-1  
 0.50064 [ 8]: 21221  
 0.30301 [ 11]: 22121  
 0.08672 [ 10]: 22112  
 0.02467 [ 4]: 12221  
 0.01604 [ 14]: 22220  
 0.01594 [ 6]: 21122  
 0.01504 [ 1]: 11222  
 0.01393 [ 2]: 12122  
 0.01257 [ 5]: 20222  
 0.00595 [ 7]: 21212  
 ROOT 13: E= -2094.4555104460 Eh 2.667 eV 21513.5 cm\*\*-1  
 0.79234 [ 6]: 21122  
 0.10573 [ 4]: 12221  
 0.03040 [ 1]: 11222  
 0.01840 [ 5]: 20222  
 0.01522 [ 8]: 21221

```

0.00919 [ 11]: 22121
0.00893 [ 14]: 22220
0.00794 [ 2]: 12122
0.00338 [ 7]: 21212
0.00278 [ 10]: 22112
ROOT 14: E= -2094.3072978087 Eh 6.700 eV 54042.4 cm**-1
0.26284 [ 5]: 20222
0.25788 [ 14]: 22220
0.25777 [ 9]: 22022
0.11108 [ 0]: 02222
0.10637 [ 12]: 22202

```

---

#### SA-CASSCF TRANSITION ENERGIES

---

LOWEST ROOT (ROOT 0 ,MULT 3) = -2094.636908215 Eh -56997.968 eV

| STATE | ROOT | MULT | DE/a.u.  | DE/eV | DE/cm**-1 |
|-------|------|------|----------|-------|-----------|
| 1:    | 1    | 3    | 0.038962 | 1.060 | 8551.2    |
| 2:    | 2    | 3    | 0.039329 | 1.070 | 8631.8    |
| 3:    | 3    | 3    | 0.041003 | 1.116 | 8999.0    |
| 4:    | 4    | 3    | 0.066871 | 1.820 | 14676.6   |
| 5:    | 5    | 3    | 0.068220 | 1.856 | 14972.5   |
| 6:    | 6    | 3    | 0.068430 | 1.862 | 15018.7   |
| 7:    | 0    | 1    | 0.083375 | 2.269 | 18298.7   |
| 8:    | 1    | 1    | 0.083596 | 2.275 | 18347.3   |
| 9:    | 2    | 1    | 0.119218 | 3.244 | 26165.3   |
| 10:   | 3    | 1    | 0.119715 | 3.258 | 26274.4   |
| 11:   | 4    | 1    | 0.121176 | 3.297 | 26595.1   |
| 12:   | 5    | 1    | 0.134948 | 3.672 | 29617.8   |
| 13:   | 7    | 3    | 0.136409 | 3.712 | 29938.3   |
| 14:   | 8    | 3    | 0.137228 | 3.734 | 30118.2   |
| 15:   | 9    | 3    | 0.138397 | 3.766 | 30374.5   |
| 16:   | 6    | 1    | 0.148501 | 4.041 | 32592.1   |
| 17:   | 7    | 1    | 0.151017 | 4.109 | 33144.5   |
| 18:   | 8    | 1    | 0.151311 | 4.117 | 33208.9   |
| 19:   | 9    | 1    | 0.177626 | 4.833 | 38984.4   |
| 20:   | 10   | 1    | 0.178178 | 4.848 | 39105.5   |
| 21:   | 11   | 1    | 0.180362 | 4.908 | 39585.0   |
| 22:   | 12   | 1    | 0.181112 | 4.928 | 39749.4   |
| 23:   | 13   | 1    | 0.181398 | 4.936 | 39812.2   |
| 24:   | 14   | 1    | 0.329610 | 8.969 | 72341.1   |

---

#### NEVPT2 TRANSITION ENERGIES

---

LOWEST ROOT (ROOT 0 ,MULT 3) = -2097.708634995 Eh -57081.554 eV

| STATE | ROOT | MULT | DE/a.u.  | DE/eV | DE/cm**-1 |
|-------|------|------|----------|-------|-----------|
| 1:    | 1    | 3    | 0.055778 | 1.518 | 12241.8   |
| 2:    | 2    | 3    | 0.056219 | 1.530 | 12338.6   |
| 3:    | 3    | 3    | 0.058123 | 1.582 | 12756.5   |
| 4:    | 0    | 1    | 0.072377 | 1.969 | 15884.9   |
| 5:    | 1    | 1    | 0.072694 | 1.978 | 15954.5   |
| 6:    | 4    | 3    | 0.091651 | 2.494 | 20115.1   |
| 7:    | 5    | 3    | 0.093800 | 2.552 | 20586.8   |
| 8:    | 6    | 3    | 0.093848 | 2.554 | 20597.2   |
| 9:    | 5    | 1    | 0.124512 | 3.388 | 27327.2   |
| 10:   | 2    | 1    | 0.126335 | 3.438 | 27727.3   |
| 11:   | 3    | 1    | 0.126929 | 3.454 | 27857.7   |
| 12:   | 4    | 1    | 0.128788 | 3.504 | 28265.7   |
| 13:   | 7    | 3    | 0.143179 | 3.896 | 31424.1   |
| 14:   | 8    | 3    | 0.143771 | 3.912 | 31554.1   |
| 15:   | 9    | 3    | 0.145304 | 3.954 | 31890.4   |
| 16:   | 6    | 1    | 0.149612 | 4.071 | 32836.1   |
| 17:   | 7    | 1    | 0.152461 | 4.149 | 33461.3   |
| 18:   | 8    | 1    | 0.152828 | 4.159 | 33541.9   |
| 19:   | 9    | 1    | 0.194308 | 5.287 | 42645.6   |
| 20:   | 10   | 1    | 0.194860 | 5.302 | 42766.9   |
| 21:   | 11   | 1    | 0.196225 | 5.340 | 43066.3   |
| 22:   | 12   | 1    | 0.197069 | 5.363 | 43251.7   |
| 23:   | 13   | 1    | 0.197259 | 5.368 | 43293.3   |
| 24:   | 14   | 1    | 0.312824 | 8.512 | 68657.0   |

---

#### Racah Parameters :

---

B = 0.005434025 a.u. = 0.148 eV = 1192.6 cm\*\*-1  
C = 0.017148476 a.u. = 0.467 eV = 3763.7 cm\*\*-1  
C/B = 3.156

---



---

The ligand field one electron eigenfunctions:

| Orbital | Energy (eV) | Energy(cm-1) | dz2       | dxz       | dyz       | dx2-y2    | dxy       |
|---------|-------------|--------------|-----------|-----------|-----------|-----------|-----------|
| 1       | 0.000       | 0.0          | 0.155518  | -0.752822 | 0.632382  | 0.031633  | 0.090361  |
| 2       | 0.009       | 70.4         | 0.042524  | 0.526895  | 0.522881  | -0.030867 | 0.667994  |
| 3       | 0.025       | 198.2        | 0.034174  | 0.384924  | 0.544774  | 0.171023  | -0.724319 |
| 4       | 1.292       | 10424.6      | 0.986305  | 0.082481  | -0.141776 | -0.003184 | -0.017016 |
| 5       | 1.375       | 11091.1      | -0.006412 | -0.025898 | -0.099043 | 0.984270  | 0.143844  |

D = -0.931115 cm-1

E/D = 0.289747

g-factors:

2.180631 2.185825 2.190407 iso = 2.185621

## Listings S3. Selected output of the stated-averaged CAS(12,12)/SC-NEVPT2 calculation for 2'.

### LOEWDIN REDUCED ACTIVE MOs

|            |          |          |          |          |         |         |
|------------|----------|----------|----------|----------|---------|---------|
|            | 81       | 82       | 83       |          |         |         |
|            | -0.52334 | -0.55344 | -0.37111 |          |         |         |
|            | 1.99796  | 1.99766  | 1.59341  |          |         |         |
| 0 Ni dz2   | 0.0      | 18.0     | 88.5     |          |         |         |
| 0 Ni dx2y2 | 15.3     | 0.0      | 0.0      |          |         |         |
| 1 N pz     | 0.0      | 19.6     | 2.0      |          |         |         |
| 4 C pz     | 0.1      | 0.1      | 0.0      |          |         |         |
| 10 N px    | 19.5     | 5.8      | 0.6      |          |         |         |
| 13 N pz    | 0.0      | 20.6     | 2.0      |          |         |         |
| 22 N py    | 20.2     | 5.7      | 0.6      |          |         |         |
| 25 O px    | 8.7      | 2.5      | 0.3      |          |         |         |
| 25 O py    | 0.4      | 0.0      | 0.0      |          |         |         |
| 28 N py    | 0.1      | 0.0      | 0.0      |          |         |         |
| 37 O px    | 0.1      | 0.1      | 0.0      |          |         |         |
| 37 O py    | 7.9      | 2.2      | 0.3      |          |         |         |
| 40 N px    | 0.1      | 0.0      | 0.0      |          |         |         |
|            | 84       | 85       | 86       | 87       | 88      | 89      |
|            | -0.38071 | -0.42335 | -0.42342 | -0.42303 | 2.06768 | 2.07738 |
|            | 1.59295  | 1.59148  | 1.59145  | 1.59120  | 0.00941 | 0.00937 |
| 0 Ni dxz   | 0.5      | 44.2     | 52.3     | 1.2      | 39.4    | 53.9    |
| 0 Ni dyz   | 0.6      | 53.1     | 42.4     | 1.8      | 52.1    | 38.6    |
| 0 Ni dx2y2 | 88.7     | 1.1      | 0.0      | 1.1      | 0.1     | 1.4     |
| 0 Ni dxy   | 1.0      | 0.1      | 3.0      | 94.4     | 1.2     | 0.5     |
|            | 90       | 91       | 92       |          |         |         |
|            | 2.10101  | 2.51464  | 2.50370  |          |         |         |
|            | 0.00924  | 0.00794  | 0.00792  |          |         |         |
| 0 Ni s     | 0.0      | 0.0      | 0.0      |          |         |         |
| 0 Ni dz2   | 0.0      | 86.5     | 1.7      |          |         |         |
| 0 Ni dx2y2 | 1.0      | 1.6      | 86.3     |          |         |         |
| 0 Ni dxy   | 92.0     | 0.0      | 1.2      |          |         |         |
| 3 H s      | 0.0      | 0.0      | 0.0      |          |         |         |
| 11 H s     | 0.1      | 0.0      | 0.0      |          |         |         |
| 12 H s     | 0.2      | 0.0      | 0.0      |          |         |         |
| 15 H s     | 0.0      | 0.0      | 0.0      |          |         |         |
| 23 H s     | 0.2      | 0.0      | 0.0      |          |         |         |
| 24 H s     | 0.1      | 0.0      | 0.0      |          |         |         |
| 31 H s     | 0.0      | 0.0      | 0.0      |          |         |         |
| 32 H s     | 0.0      | 0.0      | 0.0      |          |         |         |
| 44 H s     | 0.0      | 0.0      | 0.0      |          |         |         |

### CAS-SCF STATES FOR BLOCK 1 MULT= 3 NROOTS=10

```

ROOT 0: E= -2399.8766145825 Eh
0.97291 [ 1974]: 221122200000
ROOT 1: E= -2399.8349584496 Eh 1.134 eV 9142.5 cm**-1
0.95776 [ 1470]: 221222100000
0.01608 [ 1476]: 221221200000
ROOT 2: E= -2399.8295039750 Eh 1.282 eV 10339.6 cm**-1
0.55806 [ 315]: 222112200000
0.23254 [ 1476]: 221221200000
0.12582 [ 244]: 222121200000
0.05679 [ 1547]: 221212200000
0.00254 [ 1470]: 221222100000
ROOT 3: E= -2399.8292534450 Eh 1.289 eV 10394.6 cm**-1
0.53806 [ 244]: 222121200000
0.24607 [ 1547]: 221212200000

```

```

0.12767 [ 315]: 222112200000
0.05184 [ 1476]: 221221200000
0.00743 [ 238]: 222122100000
0.00416 [ 1470]: 221222100000
ROOT 4: E= -2399.8027968217 Eh 2.009 eV 16201.1 cm**-1
0.31550 [ 21]: 222212100000
0.24893 [ 1547]: 221212200000
0.16049 [ 244]: 222121200000
0.14765 [ 27]: 222211200000
0.08961 [ 238]: 222122100000
0.00588 [ 0]: 222221100000
0.00502 [ 1476]: 221221200000
0.00386 [ 315]: 222112200000
ROOT 5: E= -2399.8007618790 Eh 2.064 eV 16647.7 cm**-1
0.46816 [ 0]: 222221100000
0.30213 [ 1476]: 221221200000
0.14606 [ 315]: 222112200000
0.02451 [ 21]: 222212100000
0.01292 [ 1547]: 221212200000
0.00826 [ 27]: 222211200000
0.00558 [ 244]: 222121200000
0.00550 [ 238]: 222122100000
0.00507 [ 1470]: 221222100000
ROOT 6: E= -2399.7979229133 Eh 2.141 eV 17270.8 cm**-1
0.35658 [ 27]: 222211200000
0.35128 [ 238]: 222122100000
0.16617 [ 21]: 222212100000
0.05116 [ 1547]: 221212200000
0.02885 [ 0]: 222221100000
0.01041 [ 1476]: 221221200000
0.01021 [ 244]: 222121200000
0.00309 [ 315]: 222112200000
ROOT 7: E= -2399.7389723603 Eh 3.745 eV 30209.0 cm**-1
0.32724 [ 21]: 222212100000
0.23866 [ 1547]: 221212200000
0.16526 [ 238]: 222122100000
0.07198 [ 244]: 222121200000
0.06153 [ 0]: 222221100000
0.05017 [ 27]: 222211200000
0.04481 [ 1476]: 221221200000
0.01446 [ 315]: 222112200000
ROOT 8: E= -2399.7384622234 Eh 3.759 eV 30320.9 cm**-1
0.41168 [ 0]: 222221100000
0.31084 [ 1476]: 221221200000
0.12093 [ 315]: 222112200000
0.06168 [ 21]: 222212100000
0.04378 [ 1547]: 221212200000
0.01479 [ 244]: 222121200000
0.00585 [ 238]: 222122100000
0.00349 [ 27]: 222211200000
0.00309 [ 1470]: 221222100000
ROOT 9: E= -2399.7344268161 Eh 3.869 eV 31206.6 cm**-1
0.41231 [ 27]: 222211200000
0.35090 [ 238]: 222122100000
0.08209 [ 21]: 222212100000
0.07463 [ 1547]: 221212200000
0.04952 [ 244]: 222121200000

```

---

CAS-SCF STATES FOR BLOCK 2 MULT= 1 NROOTS=15

---

```

ROOT 0: E= -2399.7973844463 Eh
0.58910 [ 3858]: 220222200000
0.35292 [ 770]: 222022200000
0.02505 [ 0]: 222222000000
ROOT 1: E= -2399.7964126430 Eh 0.026 eV 213.3 cm**-1
0.94514 [ 2058]: 221122200000
0.02866 [ 34]: 222211200000
ROOT 2: E= -2399.7567371798 Eh 1.106 eV 8921.0 cm**-1
0.88587 [ 1554]: 221222100000
0.03975 [ 105]: 222202200000
0.03569 [ 7]: 222220200000
0.00896 [ 343]: 222112200000
0.00546 [ 1560]: 221221200000
ROOT 3: E= -2399.7522329352 Eh 1.229 eV 9909.6 cm**-1
0.29672 [ 272]: 222121200000
0.21890 [ 343]: 222112200000
0.18716 [ 1631]: 221212200000
0.13198 [ 1560]: 221221200000
0.04744 [ 28]: 222212100000
0.03403 [ 1]: 222221100000
0.03130 [ 770]: 222022200000
0.01350 [ 3858]: 220222200000
0.00732 [ 105]: 222202200000
0.00484 [ 7]: 222220200000

```

```

ROOT 4: E= -2399.7518765801 Eh 1.238 eV 9987.8 cm**-1
0.29075 [ 343]: 222112200000
0.23739 [ 272]: 222121200000
0.17410 [ 1560]: 221221200000
0.15672 [ 1631]: 221212200000
0.04611 [ 1]: 222221100000
0.04162 [ 28]: 222212100000
0.01539 [ 770]: 222022200000
0.00621 [ 3858]: 220222200000
0.00300 [ 105]: 222202200000
ROOT 5: E= -2399.7465873971 Eh 1.382 eV 11148.7 cm**-1
0.47008 [ 770]: 222022200000
0.27428 [ 3858]: 220222200000
0.05413 [ 7]: 222220200000
0.04965 [ 105]: 222202200000
0.04609 [ 343]: 222112200000
0.04368 [ 0]: 222222000000
0.02340 [ 1560]: 221221200000
0.00587 [ 1]: 222221100000
0.00272 [ 272]: 222121200000
ROOT 6: E= -2399.7277886330 Eh 1.894 eV 15274.5 cm**-1
0.35820 [ 1560]: 221221200000
0.26216 [ 1631]: 221212200000
0.19069 [ 343]: 222112200000
0.15538 [ 272]: 222121200000
0.00453 [ 1554]: 221222100000
ROOT 7: E= -2399.7274628139 Eh 1.903 eV 15346.0 cm**-1
0.34540 [ 1631]: 221212200000
0.26243 [ 1560]: 221221200000
0.20618 [ 272]: 222121200000
0.14509 [ 343]: 222112200000
0.01242 [ 1554]: 221222100000
ROOT 8: E= -2399.7235818363 Eh 2.008 eV 16197.8 cm**-1
0.97130 [ 266]: 222122100000
0.00403 [ 272]: 222121200000
ROOT 9: E= -2399.6925084884 Eh 2.854 eV 23017.6 cm**-1
0.60114 [ 0]: 222222000000
0.15534 [ 105]: 222202200000
0.13377 [ 7]: 222220200000
0.05457 [ 34]: 222211200000
0.01502 [ 770]: 222022200000
0.01231 [ 3858]: 220222200000
ROOT 10: E= -2399.6919286671 Eh 2.870 eV 23144.9 cm**-1
0.73388 [ 34]: 222211200000
0.15369 [ 28]: 222212100000
0.03538 [ 0]: 222222000000
0.02504 [ 2058]: 221122200000
0.00933 [ 105]: 222202200000
0.00764 [ 272]: 222121200000
0.00751 [ 7]: 222220200000
ROOT 11: E= -2399.6902701124 Eh 2.915 eV 23508.9 cm**-1
0.51390 [ 1]: 222221100000
0.18429 [ 7]: 222220200000
0.18023 [ 105]: 222202200000
0.03593 [ 343]: 222112200000
0.03353 [ 1554]: 221222100000
0.01532 [ 1560]: 221221200000
0.01238 [ 28]: 222212100000
ROOT 12: E= -2399.6891303275 Eh 2.946 eV 23759.0 cm**-1
0.70903 [ 28]: 222212100000
0.15283 [ 34]: 222211200000
0.06467 [ 272]: 222121200000
0.01879 [ 1631]: 221212200000
0.01839 [ 105]: 222202200000
0.00839 [ 7]: 222220200000
ROOT 13: E= -2399.6886767912 Eh 2.958 eV 23858.6 cm**-1
0.37161 [ 1]: 222221100000
0.26990 [ 7]: 222220200000
0.24175 [ 105]: 222202200000
0.03819 [ 343]: 222112200000
0.03778 [ 1554]: 221222100000
0.00860 [ 28]: 222212100000
0.00500 [ 34]: 222211200000
0.00296 [ 1560]: 221221200000
ROOT 14: E= -2399.5613455530 Eh 6.423 eV 51804.5 cm**-1
0.26579 [ 7]: 222220200000
0.26449 [ 0]: 222222000000
0.26201 [ 105]: 222202200000
0.08047 [ 770]: 222022200000
0.06651 [ 3858]: 220222200000
0.01733 [ 24572]: 122122200000
0.01495 [ 9069]: 211222200000

```

-----  
SA-CASSCF TRANSITION ENERGIES  
-----

LOWEST ROOT (ROOT 0 ,MULT 3) = -2399.876614583 Eh -65303.963 eV

| STATE | ROOT | MULT | DE/a.u.  | DE/eV | DE/cm**1 |
|-------|------|------|----------|-------|----------|
| 1:    | 1    | 3    | 0.041656 | 1.134 | 9142.5   |
| 2:    | 2    | 3    | 0.047111 | 1.282 | 10339.6  |
| 3:    | 3    | 3    | 0.047361 | 1.289 | 10394.6  |
| 4:    | 4    | 3    | 0.073818 | 2.009 | 16201.1  |
| 5:    | 5    | 3    | 0.075853 | 2.064 | 16647.7  |
| 6:    | 6    | 3    | 0.078692 | 2.141 | 17270.8  |
| 7:    | 0    | 1    | 0.079230 | 2.156 | 17389.0  |
| 8:    | 1    | 1    | 0.080202 | 2.182 | 17602.3  |
| 9:    | 2    | 1    | 0.119877 | 3.262 | 26310.0  |
| 10:   | 3    | 1    | 0.124382 | 3.385 | 27298.6  |
| 11:   | 4    | 1    | 0.124738 | 3.394 | 27376.8  |
| 12:   | 5    | 1    | 0.130027 | 3.538 | 28537.7  |
| 13:   | 7    | 3    | 0.137642 | 3.745 | 30209.0  |
| 14:   | 8    | 3    | 0.138152 | 3.759 | 30320.9  |
| 15:   | 9    | 3    | 0.142188 | 3.869 | 31206.6  |
| 16:   | 6    | 1    | 0.148826 | 4.050 | 32663.5  |
| 17:   | 7    | 1    | 0.149152 | 4.059 | 32735.0  |
| 18:   | 8    | 1    | 0.153033 | 4.164 | 33586.8  |
| 19:   | 9    | 1    | 0.184106 | 5.010 | 40406.6  |
| 20:   | 10   | 1    | 0.184686 | 5.026 | 40533.9  |
| 21:   | 11   | 1    | 0.186344 | 5.071 | 40897.9  |
| 22:   | 12   | 1    | 0.187484 | 5.102 | 41148.0  |
| 23:   | 13   | 1    | 0.187938 | 5.114 | 41247.6  |
| 24:   | 14   | 1    | 0.315269 | 8.579 | 69193.6  |

#### NEVPT2 TRANSITION ENERGIES

LOWEST ROOT (ROOT 0 ,MULT 3) = -2403.868606440 Eh -65412.590 eV

| STATE | ROOT | MULT | DE/a.u.  | DE/eV | DE/cm**1 |
|-------|------|------|----------|-------|----------|
| 1:    | 1    | 3    | 0.044016 | 1.198 | 9660.3   |
| 2:    | 2    | 3    | 0.049950 | 1.359 | 10962.8  |
| 3:    | 3    | 3    | 0.050243 | 1.367 | 11027.1  |
| 4:    | 0    | 1    | 0.066616 | 1.813 | 14620.4  |
| 5:    | 1    | 1    | 0.069291 | 1.886 | 15207.6  |
| 6:    | 4    | 3    | 0.076699 | 2.087 | 16833.6  |
| 7:    | 5    | 3    | 0.078704 | 2.142 | 17273.6  |
| 8:    | 6    | 3    | 0.081908 | 2.229 | 17976.8  |
| 9:    | 2    | 1    | 0.113542 | 3.090 | 24919.5  |
| 10:   | 5    | 1    | 0.115215 | 3.135 | 25286.7  |
| 11:   | 3    | 1    | 0.117145 | 3.188 | 25710.4  |
| 12:   | 4    | 1    | 0.117661 | 3.202 | 25823.7  |
| 13:   | 7    | 3    | 0.130593 | 3.554 | 28661.8  |
| 14:   | 8    | 3    | 0.131102 | 3.567 | 28773.5  |
| 15:   | 9    | 3    | 0.134920 | 3.671 | 29611.4  |
| 16:   | 6    | 1    | 0.138378 | 3.765 | 30370.4  |
| 17:   | 7    | 1    | 0.138749 | 3.776 | 30451.9  |
| 18:   | 8    | 1    | 0.142873 | 3.888 | 31357.1  |
| 19:   | 9    | 1    | 0.179313 | 4.879 | 39354.6  |
| 20:   | 10   | 1    | 0.180063 | 4.900 | 39519.4  |
| 21:   | 11   | 1    | 0.181450 | 4.938 | 39823.7  |
| 22:   | 12   | 1    | 0.182137 | 4.956 | 39974.4  |
| 23:   | 13   | 1    | 0.182604 | 4.969 | 40077.0  |
| 24:   | 14   | 1    | 0.290830 | 7.914 | 63829.7  |

D = -4.560018 cm-1  
E/D = 0.050219

g-factors:  
2.197016 2.199129 2.232439 iso = 2.209528

## Listings S4. Selected output of the stated-averaged CAS(12,12)/SC-NEVPT2 calculation for 3'.

#### LOEWDIN REDUCED ACTIVE MOs

|            | 58       | 59       |
|------------|----------|----------|
|            | -0.50431 | -0.50826 |
|            | 1.99734  | 1.99718  |
| 0 Ni dz2   | 18.0     | 0.0      |
| 0 Ni dx2y2 | 0.0      | 18.5     |
| 1 N pz     | 18.6     | 0.0      |
| 4 N py     | 5.3      | 13.5     |
| 7 N px     | 4.3      | 14.2     |
| 13 C py    | 0.0      | 0.2      |
| 16 C px    | 0.1      | 0.1      |

|      |    |      |      |  |  |  |
|------|----|------|------|--|--|--|
| 19 N | py | 4.1  | 13.8 |  |  |  |
| 22 C | py | 0.1  | 0.0  |  |  |  |
| 25 N | pz | 17.8 | 0.0  |  |  |  |
| 28 N | px | 5.5  | 13.6 |  |  |  |
| 31 C | pz | 0.1  | 0.0  |  |  |  |

  

|  | 60       | 61       | 62       | 63       | 64       | 65      |
|--|----------|----------|----------|----------|----------|---------|
|  | -0.37208 | -0.36812 | -0.42184 | -0.42184 | -0.42124 | 2.03341 |
|  | 1.59318  | 1.59318  | 1.59143  | 1.59137  | 1.59132  | 0.00964 |

---

|      |       |      |      |      |      |      |      |
|------|-------|------|------|------|------|------|------|
| 0 Ni | dz2   | 86.4 | 0.5  | 0.3  | 2.4  | 0.0  | 2.3  |
| 0 Ni | dxz   | 0.6  | 0.0  | 34.9 | 54.9 | 8.0  | 55.5 |
| 0 Ni | dyz   | 1.7  | 1.1  | 51.8 | 40.2 | 3.7  | 35.8 |
| 0 Ni | dx2y2 | 0.7  | 85.5 | 1.8  | 0.1  | 1.2  | 0.1  |
| 0 Ni | dxy   | 0.1  | 1.8  | 9.9  | 1.0  | 85.6 | 0.2  |

  

|  | 66      | 67      | 68      | 69      |
|--|---------|---------|---------|---------|
|  | 2.03379 | 2.05436 | 2.47525 | 2.49140 |
|  | 0.00963 | 0.00955 | 0.00811 | 0.00806 |

---

|      |       |      |      |      |      |
|------|-------|------|------|------|------|
| 0 Ni | dz2   | 0.2  | 0.2  | 87.2 | 0.0  |
| 0 Ni | dxz   | 12.0 | 25.9 | 0.6  | 0.1  |
| 0 Ni | dyz   | 12.8 | 42.6 | 1.9  | 0.8  |
| 0 Ni | dx2y2 | 0.6  | 2.3  | 0.0  | 86.4 |
| 0 Ni | dxy   | 68.1 | 23.4 | 0.0  | 1.9  |
| 2 H  | s     | 0.0  | 0.1  | 0.1  | 0.0  |
| 5 H  | s     | 0.0  | 0.1  | 0.0  | 0.0  |
| 8 H  | s     | 0.0  | 0.1  | 0.0  | 0.0  |
| 20 H | s     | 0.0  | 0.1  | 0.0  | 0.0  |
| 26 H | s     | 0.0  | 0.1  | 0.1  | 0.0  |
| 29 H | s     | 0.0  | 0.1  | 0.0  | 0.0  |

---

CAS-SCF STATES FOR BLOCK 1 MULT= 3 NROOTS=10

---

ROOT 0: E= -2094.7734986109 Eh  
0.97206 [ 1974]: 221122200000  
0.00255 [ 2001]: 221121111000  
0.00254 [ 2187]: 221111210100

ROOT 1: E= -2094.7266574010 Eh 1.275 eV 10280.5 cm\*\*-1  
0.69107 [ 315]: 222112200000  
0.21444 [ 1476]: 221221200000  
0.06298 [ 238]: 222122100000  
0.00516 [ 1547]: 221212200000

ROOT 2: E= -2094.7262190710 Eh 1.287 eV 10376.7 cm\*\*-1  
0.73824 [ 244]: 222121200000  
0.22776 [ 1547]: 221212200000  
0.00543 [ 1476]: 221221200000

ROOT 3: E= -2094.7242205441 Eh 1.341 eV 10815.3 cm\*\*-1  
0.89319 [ 1470]: 221222100000  
0.06694 [ 1547]: 221212200000  
0.00839 [ 244]: 222121200000  
0.00668 [ 238]: 221221000000

ROOT 4: E= -2094.6952924676 Eh 2.128 eV 17164.3 cm\*\*-1  
0.45330 [ 27]: 222211200000  
0.32121 [ 238]: 222122100000  
0.10385 [ 315]: 222112200000  
0.08298 [ 1476]: 221221200000  
0.01245 [ 0]: 222221100000

ROOT 5: E= -2094.6934748852 Eh 2.178 eV 17563.2 cm\*\*-1  
0.49977 [ 21]: 222212100000  
0.33302 [ 1547]: 221212200000  
0.10368 [ 244]: 222121200000  
0.03770 [ 1470]: 221222100000  
0.00259 [ 315]: 222112200000

ROOT 6: E= -2094.6932895829 Eh 2.183 eV 17603.8 cm\*\*-1  
0.47703 [ 0]: 222221100000  
0.30259 [ 1476]: 221221200000  
0.15022 [ 238]: 222122100000  
0.03205 [ 315]: 222112200000  
0.01191 [ 27]: 222211200000

ROOT 7: E= -2094.6323003403 Eh 3.842 eV 30989.4 cm\*\*-1  
0.43348 [ 238]: 222122100000  
0.40967 [ 27]: 222211200000  
0.09808 [ 0]: 222221100000  
0.02129 [ 315]: 222112200000  
0.00962 [ 1476]: 221221200000  
0.00317 [ 1470]: 221222100000

ROOT 8: E= -2094.6315997326 Eh 3.861 eV 31143.2 cm\*\*-1  
0.47805 [ 21]: 222212100000  
0.34012 [ 1547]: 221212200000  
0.11843 [ 244]: 222121200000  
0.03542 [ 1470]: 221222100000  
0.00255 [ 315]: 222112200000

ROOT 9: E= -2094.6302298068 Eh 3.899 eV 31443.9 cm\*\*-1



0.39033 [ 0]: 222221100000  
0.35889 [ 1476]: 221221200000  
0.11974 [ 315]: 222112200000  
0.10302 [ 27]: 222211200000  
0.00267 [ 244]: 222121200000

CAS-SCF STATES FOR BLOCK 2 MULT= 1 NROOTS=15

ROOT 0: E= -2094.6942232065 Eh  
0.51701 [ 770]: 222022200000  
0.40296 [ 3858]: 220222200000  
0.02743 [ 2058]: 221122200000  
0.01032 [ 0]: 222222000000  
0.00629 [ 28]: 222212100000  
0.00556 [ 7]: 222220200000  
0.00360 [ 105]: 222202200000  
ROOT 1: E= -2094.6939933140 Eh 0.006 eV 50.5 cm\*\*-1  
0.92015 [ 2058]: 221122200000  
0.02324 [ 34]: 222211200000  
0.01378 [ 770]: 222022200000  
0.01376 [ 3858]: 220222200000  
ROOT 2: E= -2094.6490243037 Eh 1.230 eV 9920.0 cm\*\*-1  
0.66141 [ 343]: 222112200000  
0.17867 [ 1560]: 221221200000  
0.06718 [ 1]: 222221100000  
0.05522 [ 266]: 222122100000  
0.00756 [ 34]: 222211200000  
0.00486 [ 1631]: 221212200000  
ROOT 3: E= -2094.6485064991 Eh 1.244 eV 10033.7 cm\*\*-1  
0.69142 [ 272]: 222121200000  
0.16082 [ 1631]: 221212200000  
0.05128 [ 28]: 222212100000  
0.02143 [ 105]: 222202200000  
0.01967 [ 1554]: 221222100000  
0.01049 [ 3858]: 220222200000  
0.00842 [ 770]: 222022200000  
0.00538 [ 0]: 222222000000  
0.00518 [ 1560]: 221221200000  
ROOT 4: E= -2094.6466323668 Eh 1.295 eV 10445.0 cm\*\*-1  
0.77902 [ 1554]: 221222100000  
0.08563 [ 1631]: 221212200000  
0.05473 [ 7]: 222220200000  
0.02129 [ 105]: 222202200000  
0.01255 [ 3858]: 220222200000  
0.01004 [ 770]: 222022200000  
0.00612 [ 28]: 222212100000  
0.00581 [ 266]: 222122100000  
ROOT 5: E= -2094.6453528872 Eh 1.330 eV 10725.8 cm\*\*-1  
0.44054 [ 3858]: 220222200000  
0.33850 [ 770]: 222022200000  
0.06227 [ 0]: 222222000000  
0.05163 [ 105]: 222202200000  
0.03022 [ 7]: 222220200000  
0.01651 [ 272]: 222121200000  
0.01630 [ 1554]: 221222100000  
0.01230 [ 1631]: 221212200000  
ROOT 6: E= -2094.6242607465 Eh 1.904 eV 15355.0 cm\*\*-1  
0.87762 [ 266]: 222122100000  
0.08755 [ 343]: 222112200000  
0.00649 [ 1554]: 221222100000  
ROOT 7: E= -2094.6213176800 Eh 1.984 eV 16000.9 cm\*\*-1  
0.68219 [ 1631]: 221212200000  
0.20509 [ 272]: 222121200000  
0.07985 [ 1554]: 221222100000  
0.00579 [ 343]: 222112200000  
ROOT 8: E= -2094.6209479051 Eh 1.994 eV 16082.1 cm\*\*-1  
0.76477 [ 1560]: 221221200000  
0.17101 [ 343]: 222112200000  
0.03019 [ 266]: 222122100000  
0.00492 [ 272]: 222121200000  
ROOT 9: E= -2094.5850906957 Eh 2.970 eV 23951.8 cm\*\*-1  
0.43678 [ 0]: 222222000000  
0.28555 [ 28]: 222212100000  
0.14896 [ 105]: 222202200000  
0.07963 [ 7]: 222220200000  
0.01344 [ 3858]: 220222200000  
0.01042 [ 770]: 222022200000  
ROOT 10: E= -2094.5845154212 Eh 2.985 eV 24078.1 cm\*\*-1  
0.87869 [ 34]: 222211200000  
0.07359 [ 1]: 222221100000  
0.02430 [ 2058]: 221122200000  
ROOT 11: E= -2094.5829579595 Eh 3.028 eV 24419.9 cm\*\*-1  
0.58407 [ 28]: 222212100000  
0.16624 [ 105]: 222202200000

```

0.15083 [ 0]: 222222000000
0.05578 [ 272]: 222121200000
0.01720 [ 1631]: 221212200000
0.00275 [ 1554]: 221222100000
ROOT 12: E= -2094.5821710035 Eh 3.049 eV 24592.6 cm**-1
0.83438 [ 1]: 222221100000
0.06844 [ 34]: 222211200000
0.04720 [ 343]: 222112200000
0.02284 [ 1560]: 221221200000
0.00429 [ 266]: 222122100000
ROOT 13: E= -2094.5818896742 Eh 3.057 eV 24654.4 cm**-1
0.52814 [ 7]: 222220200000
0.29168 [ 105]: 222202200000
0.06914 [ 1554]: 221222100000
0.04381 [ 28]: 222212100000
0.03525 [ 0]: 222222000000
0.00837 [ 1631]: 221212200000
ROOT 14: E= -2094.4583093813 Eh 6.420 eV 51777.1 cm**-1
0.26639 [ 7]: 222220200000
0.26500 [ 0]: 222222000000
0.26096 [ 105]: 222202200000
0.06657 [ 3858]: 220222200000
0.06277 [ 770]: 222022200000
0.02427 [ 7269]: 212122200000
0.02254 [ 26372]: 121222200000

```

---

#### SA-CASSCF TRANSITION ENERGIES

---

LOWEST ROOT (ROOT 0 ,MULT 3) = -2094.773498611 Eh -57001.685 eV

| STATE | ROOT | MULT | DE/a.u.  | DE/eV | DE/cm**-1 |
|-------|------|------|----------|-------|-----------|
| 1:    | 1    | 3    | 0.046841 | 1.275 | 10280.5   |
| 2:    | 2    | 3    | 0.047280 | 1.287 | 10376.7   |
| 3:    | 3    | 3    | 0.049278 | 1.341 | 10815.3   |
| 4:    | 4    | 3    | 0.078206 | 2.128 | 17164.3   |
| 5:    | 0    | 1    | 0.079275 | 2.157 | 17398.9   |
| 6:    | 1    | 1    | 0.079505 | 2.163 | 17449.4   |
| 7:    | 5    | 3    | 0.080024 | 2.178 | 17563.2   |
| 8:    | 6    | 3    | 0.080209 | 2.183 | 17603.8   |
| 9:    | 2    | 1    | 0.124474 | 3.387 | 27319.0   |
| 10:   | 3    | 1    | 0.124992 | 3.401 | 27432.6   |
| 11:   | 4    | 1    | 0.126866 | 3.452 | 27843.9   |
| 12:   | 5    | 1    | 0.128146 | 3.487 | 28124.7   |
| 13:   | 7    | 3    | 0.141198 | 3.842 | 30989.4   |
| 14:   | 8    | 3    | 0.141899 | 3.861 | 31143.2   |
| 15:   | 9    | 3    | 0.143269 | 3.899 | 31443.9   |
| 16:   | 6    | 1    | 0.149238 | 4.061 | 32753.9   |
| 17:   | 7    | 1    | 0.152181 | 4.141 | 33399.9   |
| 18:   | 8    | 1    | 0.152551 | 4.151 | 33481.0   |
| 19:   | 9    | 1    | 0.188408 | 5.127 | 41350.8   |
| 20:   | 10   | 1    | 0.188983 | 5.142 | 41477.0   |
| 21:   | 11   | 1    | 0.190541 | 5.185 | 41818.8   |
| 22:   | 12   | 1    | 0.191328 | 5.206 | 41991.6   |
| 23:   | 13   | 1    | 0.191609 | 5.214 | 42053.3   |
| 24:   | 14   | 1    | 0.315189 | 8.577 | 69176.0   |

---

#### NEVPT2 TRANSITION ENERGIES

---

LOWEST ROOT (ROOT 0 ,MULT 3) = -2097.659112256 Eh -57080.206 eV

| STATE | ROOT | MULT | DE/a.u.  | DE/eV | DE/cm**-1 |
|-------|------|------|----------|-------|-----------|
| 1:    | 1    | 3    | 0.049910 | 1.358 | 10954.0   |
| 2:    | 2    | 3    | 0.050236 | 1.367 | 11025.6   |
| 3:    | 3    | 3    | 0.052294 | 1.423 | 11477.3   |
| 4:    | 0    | 1    | 0.066487 | 1.809 | 14592.1   |
| 5:    | 1    | 1    | 0.067118 | 1.826 | 14730.8   |
| 6:    | 4    | 3    | 0.081260 | 2.211 | 17834.6   |
| 7:    | 5    | 3    | 0.083351 | 2.268 | 18293.4   |
| 8:    | 6    | 3    | 0.083522 | 2.273 | 18330.9   |
| 9:    | 5    | 1    | 0.111939 | 3.046 | 24567.7   |
| 10:   | 2    | 1    | 0.117441 | 3.196 | 25775.4   |
| 11:   | 3    | 1    | 0.117732 | 3.204 | 25839.2   |
| 12:   | 4    | 1    | 0.119845 | 3.261 | 26302.9   |
| 13:   | 7    | 3    | 0.134789 | 3.668 | 29582.8   |
| 14:   | 8    | 3    | 0.135208 | 3.679 | 29674.7   |
| 15:   | 9    | 3    | 0.136755 | 3.721 | 30014.3   |
| 16:   | 6    | 1    | 0.138471 | 3.768 | 30391.0   |
| 17:   | 7    | 1    | 0.141638 | 3.854 | 31086.0   |
| 18:   | 8    | 1    | 0.142143 | 3.868 | 31196.8   |
| 19:   | 9    | 1    | 0.184125 | 5.010 | 40410.9   |
| 20:   | 10   | 1    | 0.184774 | 5.028 | 40553.3   |
| 21:   | 11   | 1    | 0.185974 | 5.061 | 40816.6   |

22: 13 1 0.186811 5.083 41000.2  
 23: 12 1 0.186862 5.085 41011.4  
 24: 14 1 0.290209 7.897 63693.5

D = 1.152441 cm<sup>-1</sup>  
 E/D = 0.295284

g-factors:  
 2.189491 2.196670 2.201210 iso = 2.195790

**Listings S5.** Cartesian coordinates of [Ni(en)<sub>2</sub>(dmf)<sub>2</sub>]<sup>2+</sup> and [Ni(en)<sub>3</sub>]<sup>2+</sup> with the positions of H atoms optimized at the ωB97X-D4/ma-def2-TZVP level (all other atomic coordinates constrained to the crystallographic data). The Ni–N(O) bonds are aligned with the molecular frame.

**[Ni(en)<sub>2</sub>(dmf)<sub>2</sub>]<sup>2+</sup>**

Ni 0.00000 0.00000 0.00000  
 N 0.06242 0.03871 -2.10649  
 H -0.66032 -0.56533 -2.48652  
 H -0.07200 0.94869 -2.53755  
 C 1.38354 -0.49250 -2.49483  
 H 1.59784 -0.33054 -3.55413  
 H 1.37586 -1.56604 -2.30909  
 C 2.43347 0.18235 -1.64085  
 H 3.42889 -0.19921 -1.88070  
 H 2.44367 1.25752 -1.84448  
 N 2.09978 -0.00413 -0.20664  
 H 2.65290 0.63584 0.35427  
 H 2.38658 -0.93703 0.07515  
 N 0.00000 0.00000 2.09197  
 H -0.93474 -0.29498 2.36139  
 H 0.64978 -0.60941 2.57708  
 C 0.22119 1.39860 2.52937  
 H 1.29330 1.60538 2.45912  
 H -0.06643 1.55164 3.57282  
 C -0.54679 2.32934 1.63493  
 H -1.61730 2.12726 1.71574  
 H -0.38109 3.36804 1.93115  
 N -0.14690 2.07922 0.23314  
 H 0.74034 2.54139 0.05274  
 H -0.81126 2.52859 -0.38932  
 O -2.06627 -0.15586 0.21040  
 C -2.91183 0.31339 -0.55978  
 H -2.63673 0.68644 -1.55566  
 N -4.19446 0.40295 -0.28791  
 C -4.72525 -0.00033 0.98674  
 H -3.92067 -0.35169 1.62632  
 H -5.45177 -0.80535 0.85240  
 H -5.23124 0.84419 1.46091  
 C -5.11863 0.90567 -1.28703  
 H -4.57793 1.19281 -2.18844  
 H -5.65329 1.77637 -0.90124  
 H -5.84757 0.13419 -1.54464  
 O 0.14819 -2.07872 -0.21376

C 0.09409 -2.93740 0.66922  
 H -0.36000 -2.73210 1.64776  
 N 0.52480 -4.17404 0.52342  
 C 1.20594 -4.59167 -0.67653  
 H 0.98047 -3.90739 -1.49026  
 H 0.87068 -5.59229 -0.95381  
 H 2.28682 -4.62454 -0.51105  
 C 0.45657 -5.13996 1.60478  
 H -0.03272 -4.69843 2.47314  
 H 1.46230 -5.45989 1.88685  
 H -0.11436 -6.01446 1.28709

**[Ni(en)<sub>3</sub>]<sup>2+</sup>**

Ni 0.00000 0.00000 0.00000  
 N 0.00000 -0.00000 2.14900  
 H -0.62891 -0.67225 2.57860  
 H 0.91642 -0.22716 2.52696  
 N -0.04579 2.09440 0.29384  
 H 0.59020 2.60566 -0.31128  
 H -0.96005 2.49528 0.10058  
 N 2.12040 0.00903 -0.13229  
 H 2.40190 0.31539 -1.06041  
 H 2.59859 0.64236 0.50169  
 C -0.37043 1.36261 2.59768  
 H -0.10240 1.53934 3.64195  
 H -1.45761 1.45892 2.52531  
 C 0.30285 2.37082 1.70219  
 H 0.03064 3.38646 2.00009  
 H 1.38913 2.29369 1.80488  
 C 2.61992 -1.35799 0.08363  
 H 2.63158 -1.55125 1.16047  
 H 3.64313 -1.48925 -0.27617  
 N 0.30708 -2.09604 -0.16122  
 H 0.17427 -2.52976 0.74915  
 H -0.33416 -2.58963 -0.77515  
 C 1.68772 -2.34548 -0.60446  
 H 1.73044 -2.19936 -1.68793  
 H 2.00969 -3.37070 -0.40712  
 N -0.29631 0.25475 -2.11318

|                              |                              |
|------------------------------|------------------------------|
| H 0.21531 1.02795 -2.52838   | H -2.02571 0.29025 -3.38463  |
| H 0.00292 -0.56317 -2.63830  | H -1.98336 1.49938 -2.10962  |
| N -2.10040 -0.24923 -0.03435 | C -2.51665 -0.46751 -1.43451 |
| H -2.42875 -1.02490 0.53360  | H -3.59173 -0.32505 -1.56965 |
| H -2.59515 0.56121 0.32945   | H -2.30241 -1.50824 -1.69431 |
| C -1.74615 0.45712 -2.34177  |                              |

**Listings S6.** Cartezian coordinates of  $[\text{Ni}(\text{en})_2(\text{dmf})_2]^{2+}$  and  $[\text{Ni}(\text{en})_3]^{2+}$  with the positions of all atoms optimized at the  $\omega\text{B97X-D4/ma-def2-TZVP}$  level. The Ni–N(O) bonds are aligned with the molecular frame.

**$[\text{Ni}(\text{en})_2(\text{dmf})_2]^{2+}$**

Ni 0.00000 0.00000 0.00000  
 N 0.05654 0.00191 -2.13112  
 H -0.60512 -0.66988 -2.50631  
 H -0.16794 0.89340 -2.56312  
 C 1.43111 -0.39666 -2.52502  
 H 1.63243 -0.18019 -3.57665  
 H 1.51311 -1.47534 -2.38012  
 C 2.43108 0.31963 -1.63587  
 H 3.45030 0.03298 -1.90700  
 H 2.34966 1.40230 -1.77104  
 N 2.11967 0.00666 -0.22325  
 H 2.68051 0.58693 0.39173  
 H 2.38185 -0.95552 -0.02515  
 N -0.00000 0.00000 2.11379  
 H -0.92228 -0.32215 2.39266  
 H 0.66810 -0.63026 2.54434  
 C 0.20968 1.38390 2.58927  
 H 1.27865 1.60654 2.52710  
 H -0.08871 1.51436 3.63247  
 C -0.57483 2.32981 1.69747  
 H -1.64106 2.10274 1.76627  
 H -0.43011 3.36445 2.01730  
 N -0.16224 2.12163 0.28713  
 H 0.72544 2.58983 0.12703  
 H -0.82481 2.58501 -0.32641  
 O -2.10849 -0.18971 0.16580  
 C -3.01386 0.21126 -0.59472  
 H -2.77363 0.68308 -1.55719  
 N -4.30559 0.12672 -0.35161  
 C -4.82699 -0.46417 0.87789  
 H -4.00076 -0.77072 1.51360  
 H -5.44621 -1.32972 0.63339  
 H -5.44154 0.27018 1.40229  
 C -5.29610 0.61613 -1.31018  
 H -4.79646 1.03642 -2.18272  
 H -5.91090 1.38819 -0.84399  
 H -5.93956 -0.20592 -1.62911

O 0.21345 -2.08899 -0.09638  
 C -0.62768 -2.95513 0.22876  
 H -1.62471 -2.65685 0.57230  
 N -0.42008 -4.25514 0.19180  
 C 0.84922 -4.82865 -0.24673  
 H 1.52055 -4.03258 -0.55629  
 H 0.67151 -5.50645 -1.08391  
 H 1.30017 -5.39158 0.57314  
 C -1.45629 -5.20162 0.59875  
 H -2.35084 -4.66289 0.91029  
 H -1.09686 -5.80852 1.43201  
 H -1.70656 -5.85906 -0.23607

**$[\text{Ni}(\text{en})_3]^{2+}$**

Ni 0.00000 0.00000 0.00000  
 N -0.00000 0.00000 2.16419  
 H -0.60444 -0.69867 2.58658  
 H 0.92374 -0.18863 2.54455  
 N -0.07946 2.13861 0.32647  
 H 0.56030 2.66467 -0.26156  
 H -0.99627 2.52858 0.12572  
 N 2.16202 0.00022 -0.10581  
 H 2.47051 0.28524 -1.03171  
 H 2.63349 0.63482 0.53177  
 C -0.43231 1.34733 2.61285  
 H -0.20785 1.51809 3.66835  
 H -1.51793 1.41003 2.49896  
 C 0.24540 2.39621 1.75205  
 H -0.05511 3.39885 2.06483  
 H 1.33056 2.33449 1.87079  
 C 2.63374 -1.38428 0.14525  
 H 2.58889 -1.57017 1.22208  
 H 3.67205 -1.52531 -0.16387  
 N 0.32733 -2.13476 -0.14769  
 H 0.19905 -2.57496 0.75977

H -0.30085 -2.63466 -0.76979  
 C 1.72763 -2.35506 -0.58714  
 H 1.77960 -2.17490 -1.66462  
 H 2.05348 -3.38359 -0.41553  
 N -0.25301 0.21374 -2.13809  
 H 0.29693 0.95841 -2.55638  
 H 0.02145 -0.62737 -2.63882  
 N -2.15092 -0.22305 -0.09781  
 H -2.50755 -0.99150 0.46265

H -2.64187 0.59799 0.24537  
 C -1.69180 0.47244 -2.39654  
 H -1.95037 0.32855 -3.44823  
 H -1.89680 1.51853 -2.15332  
 C -2.52421 -0.44169 -1.51802  
 H -3.58926 -0.27147 -1.69138  
 H -2.32134 -1.48697 -1.76652

**Listings S7.** Cartesian coordinates of  $[\text{Ni}(\text{en})_2(\text{dmf})_2]^{2+}$  with the positions of all atoms optimized at the  $\omega\text{B97X-D4/ma-def2-TZVP}$  level, keeping the  $[\text{O}]_{\text{dmf1}}\text{-Ni-}[\text{O-C}]_{\text{dmf2}}$  torsion angle constrained to the indicated value (the angle of  $-16.85^\circ$  corresponds to the fully optimized structure, Listing S6). The Ni-N(O) bonds are aligned with the molecular frame.

**-135**

Ni 0.00000 0.00000 0.00000  
 N 0.01887 0.02704 -2.12037  
 H -0.64181 -0.65913 -2.46857  
 H -0.26805 0.91834 -2.51292  
 C 1.38586 -0.31028 -2.57351  
 H 1.55577 -0.03690 -3.61757  
 H 1.50588 -1.39320 -2.49106  
 C 2.38839 0.39009 -1.67378  
 H 3.41027 0.16019 -1.98504  
 H 2.26180 1.47394 -1.74375  
 N 2.13085 -0.01221 -0.26914  
 H 2.65730 0.58589 0.35983  
 H 2.49948 -0.94775 -0.12544  
 N -0.00000 -0.00000 2.12454  
 H -0.94009 -0.28110 2.38946  
 H 0.62961 -0.63469 2.60371  
 C 0.24523 1.38691 2.58407  
 H 1.31941 1.58109 2.51445  
 H -0.04514 1.53136 3.62769  
 C -0.52171 2.34128 1.68736  
 H -1.59121 2.13524 1.75807  
 H -0.35624 3.37469 2.00053  
 N -0.11770 2.11632 0.27837  
 H 0.72928 2.64027 0.07997  
 H -0.83341 2.49164 -0.33552  
 O -2.09668 0.12739 0.05412  
 C -2.94025 -0.75896 -0.20245  
 H -2.61705 -1.77840 -0.44110  
 N -4.24444 -0.57309 -0.21048  
 C -4.84816 0.72253 0.08782  
 H -4.06639 1.45488 0.26887  
 H -5.48378 0.63600 0.97154  
 H -5.46161 1.04135 -0.75718  
 C -5.16530 -1.66536 -0.51629

H -4.60582 -2.57864 -0.71728  
 H -5.76305 -1.41166 -1.39387  
 H -5.83364 -1.83486 0.33014  
 O -0.14237 -2.10774 -0.19513  
 C 0.47385 -3.03485 0.36863  
 H 1.18723 -2.82906 1.17889  
 N 0.35348 -4.31456 0.07986  
 C -0.54420 -4.79047 -0.96872  
 H -0.97557 -3.94096 -1.49152  
 H -1.33847 -5.39627 -0.52701  
 H 0.01721 -5.40746 -1.67268  
 C 1.09921 -5.33661 0.81370  
 H 1.72822 -4.86929 1.57105  
 H 1.72913 -5.90116 0.12393  
 H 0.40398 -6.02203 1.30204

**-90**

Ni 0.00000 0.00000 0.00000  
 N 0.05096 0.05311 -2.12536  
 H -0.60504 -0.61972 -2.50679  
 H -0.21356 0.95371 -2.51272  
 C 1.42524 -0.29460 -2.55305  
 H 1.61637 -0.01741 -3.59239  
 H 1.53198 -1.37831 -2.46994  
 C 2.41795 0.39046 -1.63135  
 H 3.44196 0.14413 -1.92276  
 H 2.31062 1.47659 -1.70173  
 N 2.12399 -0.01090 -0.23533  
 H 2.66605 0.55790 0.40705  
 H 2.43740 -0.96706 -0.09364  
 N -0.00000 -0.00000 2.12976  
 H -0.93482 -0.28456 2.40977  
 H 0.64588 -0.62303 2.60284  
 C 0.23889 1.39179 2.57981  
 H 1.30999 1.59542 2.49347

H -0.03768 1.53713 3.62700  
 C -0.54916 2.33480 1.69018  
 H -1.61532 2.11527 1.77194  
 H -0.39383 3.37071 2.00031  
 N -0.15519 2.11164 0.27863  
 H 0.68889 2.63804 0.07404  
 H -0.87625 2.48430 -0.33057  
 O -2.09879 0.04763 0.08554  
 C -2.90252 -0.77872 -0.39701  
 H -2.53820 -1.70197 -0.86375  
 N -4.21263 -0.64324 -0.39708  
 C -4.87338 0.52287 0.18278  
 H -4.12509 1.21633 0.55619  
 H -5.52318 0.20646 1.00135  
 H -5.48120 1.01308 -0.58024  
 C -5.08292 -1.66215 -0.98000  
 H -4.48372 -2.47944 -1.38078  
 H -5.67590 -1.22563 -1.78593  
 H -5.75776 -2.05412 -0.21660  
 O -0.00664 -2.10579 -0.26937  
 C 0.02539 -3.05632 0.53966  
 H -0.00160 -2.87917 1.62264  
 N 0.08760 -4.33036 0.20984  
 C 0.13689 -4.77018 -1.18185  
 H 0.07428 -3.90702 -1.83899  
 H -0.69743 -5.44601 -1.37975  
 H 1.07150 -5.30463 -1.36429  
 C 0.12636 -5.38047 1.22704  
 H 0.08985 -4.93854 2.22247  
 H 1.04685 -5.95852 1.12634  
 H -0.72754 -6.04870 1.10153

#### -77.41

Ni 0.00000 0.00000 0.00000  
 N 0.28561 -0.20161 -2.09993  
 H -0.31741 -0.92732 -2.47181  
 H 0.06102 0.64215 -2.61841  
 C 1.70187 -0.56984 -2.32919  
 H 2.00533 -0.41318 -3.36695  
 H 1.80561 -1.63374 -2.10602  
 C 2.58165 0.23782 -1.39227  
 H 3.63285 -0.02344 -1.53702  
 H 2.47824 1.30583 -1.60429  
 N 2.13444 -0.00000 0.00000  
 H 2.60410 0.64513 0.62701  
 H 2.42411 -0.93087 0.28704  
 N -0.23006 0.25751 2.10081  
 H -1.18931 -0.00108 2.31562  
 H 0.36347 -0.29777 2.70805  
 C -0.03912 1.69630 2.39998  
 H 1.03486 1.90269 2.39725

H -0.42060 1.96389 3.38848  
 C -0.73497 2.51299 1.32717  
 H -1.80338 2.28876 1.32779  
 H -0.61504 3.58108 1.52258  
 N -0.19906 2.12675 0.00000  
 H 0.65958 2.63790 -0.18138  
 H -0.85547 2.41195 -0.71954  
 O -2.09822 0.00533 -0.13694  
 C -2.83362 -0.86488 -0.64982  
 H -2.40943 -1.80935 -1.01305  
 N -4.13725 -0.75646 -0.80284  
 C -4.87304 0.43136 -0.37770  
 H -4.17963 1.16212 0.02908  
 H -5.60570 0.15556 0.38355  
 H -5.39840 0.85911 -1.23383  
 C -4.92421 -1.82747 -1.41067  
 H -4.27420 -2.65747 -1.68683  
 H -5.42756 -1.45526 -2.30496  
 H -5.67618 -2.18195 -0.70306  
 O 0.07032 -2.11990 0.00541  
 C -0.16467 -2.95449 0.90406  
 H -0.53362 -2.63702 1.88807  
 N -0.01329 -4.25778 0.78532  
 C 0.47140 -4.87283 -0.44756  
 H 0.61896 -4.10609 -1.20320  
 H -0.25899 -5.60309 -0.80132  
 H 1.41553 -5.38651 -0.25455  
 C -0.30615 -5.16440 1.89471  
 H -0.65609 -4.59855 2.75779  
 H 0.59530 -5.71505 2.17011  
 H -1.07857 -5.87581 1.59683

#### -45

Ni 0.00000 0.00000 0.00000  
 N 0.08018 0.05832 -2.12998  
 H -0.57170 -0.59557 -2.54958  
 H -0.15672 0.96967 -2.51092  
 C 1.46005 -0.30506 -2.53294  
 H 1.66877 -0.03368 -3.57037  
 H 1.55264 -1.38926 -2.44330  
 C 2.44575 0.37352 -1.59948  
 H 3.47027 0.10857 -1.87243  
 H 2.35687 1.46072 -1.68149  
 N 2.12154 -0.01100 -0.20715  
 H 2.67053 0.54429 0.44076  
 H 2.39407 -0.97828 -0.05385  
 N -0.00000 -0.00000 2.12496  
 H -0.93176 -0.27970 2.41849  
 H 0.64902 -0.63813 2.57330  
 C 0.25451 1.38651 2.57718  
 H 1.32511 1.58549 2.47670

H -0.00661 1.53194 3.62837  
 C -0.54179 2.33528 1.70017  
 H -1.60795 2.12209 1.79924  
 H -0.37613 3.37037 2.00763  
 N -0.17262 2.11132 0.28138  
 H 0.67358 2.63025 0.06600  
 H -0.89763 2.49647 -0.31528  
 O -2.10826 -0.02950 0.13333  
 C -2.94080 -0.66366 -0.54757  
 H -2.61279 -1.40704 -1.28634  
 N -4.24834 -0.53049 -0.46111  
 C -4.87259 0.41093 0.46510  
 H -4.10321 0.92594 1.03352  
 H -5.53283 -0.13051 1.14550  
 H -5.46420 1.13691 -0.09624  
 C -5.15223 -1.31344 -1.30196  
 H -4.57947 -1.97566 -1.95093  
 H -5.75615 -0.64480 -1.91824  
 H -5.81554 -1.91216 -0.67490  
 O 0.12084 -2.09948 -0.19114  
 C -0.48005 -2.97411 0.46747  
 H -1.24201 -2.69443 1.20689  
 N -0.28612 -4.27198 0.35578  
 C 0.69013 -4.83321 -0.57469  
 H 1.15152 -4.03169 -1.14486  
 H 0.18886 -5.52599 -1.25331  
 H 1.45545 -5.37764 -0.01770  
 C -1.02904 -5.22713 1.17604  
 H -1.72109 -4.69809 1.83098  
 H -0.33550 -5.80930 1.78573  
 H -1.59209 -5.90708 0.53399

0°

Ni 0.00000 0.00000 0.00000  
 N 0.05248 -0.00148 -2.13108  
 H -0.62145 -0.65728 -2.51269  
 H -0.15667 0.89640 -2.55769  
 C 1.42130 -0.41870 -2.52489  
 H 1.62233 -0.21526 -3.57922  
 H 1.49354 -1.49666 -2.36865  
 C 2.42996 0.29783 -1.64565  
 H 3.44595 -0.00044 -1.91630  
 H 2.35749 1.37960 -1.79274  
 N 2.11936 0.00329 -0.22910  
 H 2.68414 0.58754 0.37838  
 H 2.37498 -0.95819 -0.01960  
 N 0.00000 0.00000 2.11009  
 H -0.91988 -0.33282 2.38412  
 H 0.67153 -0.63116 2.53372  
 C 0.20108 1.38149 2.59333  
 H 1.26960 1.60880 2.53969

H -0.10487 1.50722 3.63494  
 C -0.57971 2.32917 1.69985  
 H -1.64648 2.10295 1.76401  
 H -0.43621 3.36323 2.02217  
 N -0.16093 2.12389 0.29060  
 H 0.73276 2.58352 0.13907  
 H -0.81347 2.59931 -0.32451  
 O -2.10505 -0.21518 0.15663  
 C -3.02437 0.28776 -0.52210  
 H -2.80245 0.90352 -1.40461  
 N -4.31148 0.15067 -0.27808  
 C -4.80718 -0.62867 0.85337  
 H -3.96806 -1.03446 1.41204  
 H -5.43669 -1.44260 0.48792  
 H -5.40586 0.01254 1.50337  
 C -5.32155 0.77269 -1.13369  
 H -4.83989 1.32697 -1.93895  
 H -5.93365 1.45789 -0.54437  
 H -5.96487 0.00361 -1.56516  
 O 0.23353 -2.09055 -0.03631  
 C -0.64864 -2.97465 0.02222  
 H -1.70733 -2.69735 0.07374  
 N -0.41361 -4.27074 0.03113  
 C 0.93891 -4.81818 -0.02297  
 H 1.65916 -4.00598 -0.06381  
 H 1.04329 -5.44812 -0.90873  
 H 1.12211 -5.42626 0.86519  
 C -1.50496 -5.23964 0.10233  
 H -2.46234 -4.72015 0.13428  
 H -1.39992 -5.85126 1.00053  
 H -1.48049 -5.89036 -0.77390

45°

Ni 0.00000 0.00000 0.00000  
 N 0.11923 0.07166 -2.12192  
 H -0.56457 -0.52537 -2.57452  
 H -0.08137 1.00828 -2.46035  
 C 1.49243 -0.31472 -2.51609  
 H 1.71707 -0.04708 -3.55138  
 H 1.57448 -1.40087 -2.42849  
 C 2.47815 0.35336 -1.57313  
 H 3.50125 0.06650 -1.82851  
 H 2.41055 1.44072 -1.67125  
 N 2.12902 -0.00371 -0.17923  
 H 2.66812 0.56563 0.46484  
 H 2.39743 -0.96736 0.00219  
 N 0.00000 0.00000 2.12043  
 H -0.88697 -0.34730 2.47157  
 H 0.70696 -0.61318 2.51260  
 C 0.20028 1.39313 2.57760  
 H 1.26381 1.63082 2.48754

H -0.07465 1.52856 3.62648  
 C -0.61815 2.31477 1.69069  
 H -1.67830 2.06495 1.77393  
 H -0.49619 3.35489 2.00176  
 N -0.22020 2.10673 0.27743  
 H 0.60965 2.65628 0.07503  
 H -0.95146 2.46142 -0.33052  
 O -2.09975 -0.02270 -0.14824  
 C -2.94843 -0.78394 0.35943  
 H -2.63959 -1.63087 0.98745  
 N -4.25242 -0.67028 0.20812  
 C -4.84887 0.39507 -0.59434  
 H -4.06254 0.99338 -1.04614  
 H -5.47434 1.02554 0.04107  
 H -5.47194 -0.04445 -1.37563  
 C -5.17888 -1.60090 0.84998  
 H -4.62500 -2.34315 1.42461  
 H -5.77868 -2.10840 0.09207  
 H -5.84533 -1.05582 1.52113  
 O 0.15913 -2.10627 0.05621  
 C -0.39745 -2.98359 -0.63503  
 H -1.16029 -2.71415 -1.37836  
 N -0.15469 -4.27614 -0.55804  
 C 0.82239 -4.82603 0.37891  
 H 1.23223 -4.02555 0.98862  
 H 1.62490 -5.31786 -0.17476  
 H 0.33464 -5.56290 1.01986  
 C -0.84825 -5.23548 -1.41570  
 H -1.54336 -4.71449 -2.07396  
 H -1.40171 -5.94847 -0.80170  
 H -0.12294 -5.78038 -2.02285

#### 90°

Ni 0.00000 0.00000 0.00000  
 N 0.09972 0.07366 -2.12525  
 H -0.56231 -0.54916 -2.57570  
 H -0.15498 1.00386 -2.44417  
 C 1.48382 -0.23513 -2.54861  
 H 1.68694 0.09012 -3.57175  
 H 1.61490 -1.31987 -2.51882  
 C 2.45511 0.42269 -1.58329  
 H 3.48486 0.18216 -1.85906  
 H 2.35079 1.51020 -1.63252  
 N 2.12896 -0.00651 -0.20441  
 H 2.64847 0.55662 0.46117  
 H 2.44165 -0.96270 -0.05986  
 N 0.00000 0.00000 2.11285  
 H -0.90673 -0.33284 2.42605  
 H 0.68275 -0.62960 2.52078  
 C 0.21254 1.38565 2.58350  
 H 1.28102 1.60869 2.51349

H -0.07841 1.51836 3.62846  
 C -0.57860 2.32458 1.69013  
 H -1.64277 2.08919 1.75609  
 H -0.44372 3.36116 2.00755  
 N -0.16467 2.11774 0.28040  
 H 0.67460 2.65796 0.09247  
 H -0.88409 2.48813 -0.33230  
 O -2.09467 0.08284 -0.06769  
 C -2.93647 -0.81761 0.13442  
 H -2.61444 -1.83190 0.39945  
 N -4.24201 -0.65649 0.05963  
 C -4.84785 0.62830 -0.27980  
 H -4.06707 1.35712 -0.47854  
 H -5.46982 0.97050 0.54999  
 H -5.47561 0.51182 -1.16538  
 C -5.16149 -1.76143 0.32138  
 H -4.60061 -2.66287 0.56721  
 H -5.77463 -1.95056 -0.56183  
 H -5.81537 -1.50899 1.15838  
 O 0.00474 -2.12091 0.13123  
 C 0.03212 -3.08384 -0.66106  
 H -0.03835 -2.93018 -1.74640  
 N 0.13800 -4.35014 -0.31116  
 C 0.24440 -4.76094 1.08644  
 H 0.19001 -3.88535 1.72747  
 H 1.19410 -5.27594 1.24509  
 H -0.57065 -5.44621 1.32747  
 C 0.16752 -5.41813 -1.30944  
 H 0.08565 -4.99658 -2.31111  
 H -0.66458 -6.10449 -1.14202  
 H 1.10481 -5.97208 -1.23041

#### 135°

Ni 0.00000 0.00000 0.00000  
 N 0.06304 0.05564 -2.12380  
 H -0.56897 -0.62436 -2.53262  
 H -0.25926 0.95858 -2.45859  
 C 1.44979 -0.18512 -2.58091  
 H 1.62180 0.18405 -3.59474  
 H 1.61871 -1.26457 -2.59982  
 C 2.41813 0.47062 -1.61079  
 H 3.45000 0.27129 -1.91049  
 H 2.27978 1.55504 -1.62334  
 N 2.12956 -0.01060 -0.23951  
 H 2.63712 0.55380 0.43444  
 H 2.49028 -0.95361 -0.12550  
 N 0.00000 0.00000 2.10979  
 H -0.92387 -0.30948 2.39647  
 H 0.65593 -0.64590 2.53571  
 C 0.23555 1.37961 2.58687  
 H 1.30868 1.58248 2.52498



H -0.06022 1.51397 3.63030  
 C -0.53246 2.33644 1.69238  
 H -1.60114 2.12246 1.75439  
 H -0.37668 3.36933 2.01211  
 N -0.11818 2.12393 0.28330  
 H 0.72834 2.65329 0.09741  
 H -0.83097 2.50500 -0.33053  
 O -2.09380 0.15106 -0.02903  
 C -2.95474 -0.75427 -0.05957  
 H -2.65258 -1.80686 -0.02347  
 N -4.25467 -0.55114 -0.13198  
 C -4.83083 0.78939 -0.18932  
 H -4.03378 1.52763 -0.19241  
 H -5.47675 0.94834 0.67670  
 H -5.42843 0.89038 -1.09746  
 C -5.19777 -1.66668 -0.15432  
 H -4.65742 -2.61171 -0.10459  
 H -5.78442 -1.63824 -1.07459  
 H -5.87489 -1.59708 0.69926  
 O -0.16590 -2.11820 0.10630  
 C 0.34081 -3.13160 -0.41387  
 H 1.04589 -3.04913 -1.25202  
 N 0.10569 -4.37427 -0.04205  
 C -0.79429 -4.69434 1.06174  
 H -1.14820 -3.77463 1.52017  
 H -0.26050 -5.29116 1.80377  
 H -1.64159 -5.27453 0.68952  
 C 0.73565 -5.50636 -0.72024  
 H 1.37895 -5.14968 -1.52433  
 H -0.03154 -6.15885 -1.14134  
 H 1.33566 -6.07661 -0.00872

#### 180°

Ni 0.00000 0.00000 0.00000  
 N 0.03762 0.00682 -2.12159  
 H -0.62713 -0.66722 -2.48589  
 H -0.23508 0.90423 -2.51094  
 C 1.40665 -0.33876 -2.56202  
 H 1.58555 -0.07536 -3.60721  
 H 1.52363 -1.42197 -2.47395  
 C 2.40580 0.36599 -1.66115  
 H 3.42911 0.12816 -1.96148

**Listings S8.** Cartesian coordinates of the starting reagents, product and intermediate for the  $^3\text{R}_1 \rightarrow ^3\text{P}_1$  reaction. All geometries are optimized at the  $\omega\text{B97X-D4/ma-def2-TZVP}$  level with the C-PCM dmf solvation model.

#### ethylenediamine

N -0.42923754848412 -2.39957180734164 -1.78268938770550  
 H 0.43849104917729 -2.69591366669415 -1.34993561426794  
 C -1.53113835575902 -2.51707225158867 -0.82200341166020

H 2.28439 1.44912 -1.74813  
 N 2.13461 -0.01267 -0.25288  
 H 2.62792 0.61766 0.37143  
 H 2.53135 -0.92909 -0.06952  
 N -0.00000 -0.00000 2.11089  
 H -0.93820 -0.28408 2.37818  
 H 0.63132 -0.65342 2.56173  
 C 0.25801 1.37782 2.58428  
 H 1.33467 1.56145 2.52358  
 H -0.03713 1.51884 3.62704  
 C -0.49328 2.34689 1.68885  
 H -1.56533 2.15374 1.75581  
 H -0.31576 3.37706 2.00592  
 N -0.08927 2.12335 0.27844  
 H 0.76111 2.64304 0.08326  
 H -0.80181 2.50710 -0.33394  
 O -2.09327 0.17799 0.03917  
 C -2.95599 -0.67685 -0.25540  
 H -2.65501 -1.69280 -0.53382  
 N -4.25579 -0.46066 -0.26026  
 C -4.83042 0.83587 0.08756  
 H -4.03233 1.54266 0.29683  
 H -5.46877 0.73047 0.96729  
 H -5.43528 1.20090 -0.74484  
 C -5.20041 -1.51824 -0.61173  
 H -4.66104 -2.43409 -0.85250  
 H -5.79187 -1.21469 -1.47766  
 H -5.87307 -1.70882 0.22686  
 O -0.24023 -2.11474 -0.02827  
 C 0.49665 -3.11987 -0.05652  
 H 1.57326 -3.03377 -0.25781  
 N 0.09650 -4.35994 0.14036  
 C -1.29705 -4.67988 0.43392  
 H -1.82223 -3.77505 0.72962  
 H -1.33156 -5.40302 1.24988  
 H -1.77598 -5.11787 -0.44527  
 C 1.02166 -5.48794 0.03583  
 H 2.02181 -5.12948 -0.20665  
 H 0.68790 -6.16795 -0.75031  
 H 1.05519 -6.02808 0.98357

H -0.29932648406416 -1.42497540770741 -2.03538611151217  
H -1.40621738497678 -1.87129458875101 0.05827668577898  
H -1.56212627746102 -3.55138415658273 -0.46256201082954  
C -2.85794992645038 -2.18213623576558 -1.48904728511194  
H -2.82601536114237 -1.14850314797648 -1.85028375174761  
N -3.95961671771579 -2.29737950783530 -0.52761623351130  
H -2.98410579535305 -2.82947112146692 -2.36798099948368  
H -4.08847122354826 -3.27131916804631 -0.27187217660367  
H -4.82745597422233 -2.00341894024379 -0.96179970334544

#### dimethylformamide

O -2.53029850953118 3.27889670795931 -1.13794652118753  
C -3.43722014358626 4.10539827982818 -1.23164930778323  
H -3.77549796491091 4.47849394628681 -2.21087803781583  
N -4.11012905424775 4.64757066213280 -0.20875392960550  
C -3.82321126510611 4.28902874743442 1.16881829486519  
H -2.96618767644575 3.61985388913520 1.19476205794665  
H -4.68772015678708 3.78991265897131 1.61639774875290  
H -3.60034486492459 5.19027499684341 1.74634243398706  
C -5.18257183097024 5.60168095324273 -0.43114078605656  
H -5.29725445528852 5.78444018406882 -1.49986738062277  
H -4.95558445140827 6.54710210587019 0.06950817152437  
H -6.12418562679324 5.21157186822670 -0.03413474400473

#### <sup>3</sup>R<sub>1</sub>

Ni 0.26588883818939 0.12728873005357 0.00188676988798  
N 0.10936327613474 0.08070536466289 -2.10369221760339  
H -0.53087182434948 -0.63907415801628 -2.42114297435698  
H -0.23791452589874 0.96055910342676 -2.47312930129080  
C 1.46467719613201 -0.17944025016555 -2.62794453369002  
H 1.54175195211656 0.05010024486778 -3.69422734817462  
H 1.67605654572911 -1.24228879628460 -2.49095365742223  
C 2.46511044036057 0.64645701940959 -1.83805095241773  
H 3.47895472851807 0.46801764961514 -2.20728859752804  
H 2.24354409658337 1.71040080884527 -1.95927731458758  
N 2.32842948632639 0.31576806016524 -0.40710107874205  
H 2.81798495057874 0.99769049214706 0.16188708715314  
H 2.75646355371239 -0.58522385138363 -0.21656557526845  
N 0.47544453105325 0.20815945317614 2.09728203146094  
H -0.36213283512291 -0.18129818822138 2.51919978741689  
H 1.25778181584233 -0.33329291408011 2.44787079914682  
C 0.61639612410668 1.62621921354461 2.47840283554985  
H 1.64802013642744 1.92666649708673 2.27645096372508  
H 0.41919757002454 1.78812995139990 3.54171838232493  
C -0.33301325890975 2.45955705855832 1.63462210755253  
H -1.36365039886510 2.14918780933034 1.82269357661813  
H -0.24227308533683 3.51743633562438 1.89626559513062  
N -0.04101835575099 2.21493810517668 0.20852324423667  
H 0.79441902972950 2.72568581281563 -0.06139550878673  
H -0.79030748764475 2.57803334230890 -0.37097486069744  
O -1.79497512867968 -0.24386043833389 0.33029067149427

C -2.71442259969522 0.18261791359477 -0.39006732357002  
 H -2.51150139290720 0.85342248185847 -1.23334659986782  
 N -3.99329511677033 -0.11180672075643 -0.22477126797300  
 C -4.44799906381668 -0.99308865644535 0.84084197583533  
 H -3.59320235273690 -1.33088596674069 1.42145258095483  
 H -4.96147989042231 -1.85458879962203 0.40711141155169  
 H -5.14381297930254 -0.45428785524070 1.48849684440460  
 C -5.01285541241086 0.43109636001617 -1.11097443494063  
 H -4.54540258430492 1.06615581269650 -1.86311817132570  
 H -5.72843009072083 1.02200197375493 -0.53432723881115  
 H -5.54374634664039 -0.38485841335505 -1.60723047990457  
 O 0.56453709658484 -1.97541187693772 -0.05490520768806  
 C -0.14194987548895 -2.75710587030729 0.60645856448577  
 H -0.95468113725919 -2.38552183337513 1.23865583980951  
 N 0.00222527017956 -4.07307848026602 0.61383716201491  
 C 1.02561992040593 -4.74212868060248 -0.17517359426065  
 H 1.56664607270069 -4.00664810417160 -0.76526474384732  
 H 0.55454138789632 -5.47125977808898 -0.83881022865216  
 H 1.71993017845138 -5.26388001559211 0.48834947865988  
 C -0.85773293368496 -4.91668101144911 1.43074474957632  
 H -1.57477698825656 -4.29636152500534 1.96813103292064  
 H -0.25447590372740 -5.47565688643119 2.15036001110888  
 H -1.39719262908028 -5.62327652326302 0.79538970838693

### <sup>3</sup>I<sub>1</sub>

Ni 1.33713161028104 1.26472327368787 -0.11835847780544  
 N 0.72193072874046 0.77706634242264 -2.06766044181684  
 H 0.08492089559058 -0.02343768348838 -2.06883665643650  
 H 0.24565568789723 1.55204149748711 -2.51787300482555  
 C 1.93649807638620 0.43052400210890 -2.82734947630495  
 H 1.76257652215430 0.43921750552620 -3.90727795115957  
 H 2.22861827463668 -0.58307330113778 -2.54054117108236  
 C 3.04888550985087 1.40066816371633 -2.46786652180345  
 H 3.96291414573377 1.15346004016572 -3.01549305106243  
 H 2.75481665449999 2.41746372137711 -2.74256994096391  
 N 3.25029943177214 1.36683015192021 -1.00704981818236  
 H 3.82244613061292 2.14952359801985 -0.70974681670422  
 H 3.75142261491346 0.52324912818555 -0.74555928067399  
 N 2.00017129786946 1.79798483629620 1.81361967709013  
 H 1.30047996361553 1.50288636555780 2.48764545010649  
 H 2.87008389374960 1.35098120477838 2.08102961667552  
 C 2.14066712116067 3.26576640577436 1.84940417437803  
 H 3.08446597888977 3.52486872511058 1.36204461266066  
 H 2.17210108538327 3.65151603293581 2.87222080753433  
 C 0.98381969459295 3.88948825287893 1.08768477751205  
 H 0.03877485935644 3.61556003020221 1.56276536457797  
 H 1.06792486868860 4.97978887943161 1.09837990380736  
 N 0.97231082542422 3.34759776847599 -0.28491243906039  
 H 1.69806497429616 3.79599456322220 -0.83585368642806  
 H 0.09444603848241 3.56731485402391 -0.74371989258387  
 O -0.57496251260159 0.97462037972652 0.75005687171006

C -1.66072940014956 1.18078095453348 0.18033195042937  
 H -1.70193277610874 1.57169906533467 -0.84309026234847  
 N -2.84287673185214 0.95704106482831 0.72890147613846  
 C -2.96687585615591 0.44945595853630 2.08783754143449  
 H -2.01516223294493 0.03073028060533 2.40703057471177  
 H -3.73324851968547 -0.32659689932583 2.10668812391337  
 H -3.25752317764181 1.25635133546881 2.76627145048431  
 C -4.07525787342037 1.28013078448367 0.02501406793133  
 H -3.84177724549840 1.64605834850621 -0.97471323900413  
 H -4.62457865112784 2.05122446695357 0.57100207015228  
 H -4.69778048552734 0.38647211861579 -0.05368924085487  
 O 1.72281450441425 -0.80632137243675 0.22377441269908  
 C 1.17467060767829 -1.42264128039771 1.15496497878604  
 H 0.53495908573480 -0.90424072842252 1.87582892747536  
 N 1.28892936304867 -2.72583120391593 1.36040510652040  
 C 2.09062407661862 -3.57748283974732 0.49462108695265  
 H 2.60147184067671 -2.96487750534905 -0.24465229082003  
 H 1.44541956289110 -4.30135774698705 -0.01056343302321  
 H 2.82630936689736 -4.11750746822564 1.09504935351749  
 C 0.57459268955343 -3.37847128774626 2.44770673157831  
 H 0.00904537403654 -2.63768536067790 3.01254223716375  
 H 1.28389140403060 -3.87580458384984 3.11351753952781  
 H -0.11500187557828 -4.12329852651509 2.04223313143523  
 N -0.52135081631017 -2.01604150867484 -1.87419388052944  
 H 0.41127018931580 -2.20067548711579 -1.52155407267321  
 C -1.51925313486255 -2.31780157923155 -0.84335507131389  
 H -0.65066027738493 -2.63562058791390 -2.66777679362101  
 H -1.33876243166419 -1.67195079321894 0.02016417147002  
 H -1.46039434187451 -3.35717361683545 -0.48780671021128  
 C -2.92041248385658 -2.05434825678468 -1.37402351995569  
 H -3.01601467233788 -0.99387574138931 -1.62477532804677  
 N -3.92055188652185 -2.38714656373081 -0.35616181689049  
 H -3.05743086980569 -2.61909278177124 -2.30848753534590  
 H -3.93703704566304 -3.39106723079575 -0.20758259501685  
 H -4.84585165090118 -2.13565516521293 -0.68564577182497

### <sup>3</sup>Ti

Ni 0.85957850640252 1.43850748997119 -0.38706590278936  
 N 0.34898138191626 1.11754015150478 -2.37360343727013  
 H -0.27170695042880 0.31240764546938 -2.32435064322821  
 H -0.13336846161232 1.89257388833066 -2.81339566457459  
 C 1.55616331074544 0.73916344532431 -3.13876738593313  
 H 1.46749958761304 1.02010488254262 -4.19053856567929  
 H 1.65339869526876 -0.34791191413791 -3.08904311920437  
 C 2.78382459305262 1.38810975976611 -2.52165328470082  
 H 3.69112580507697 1.03691872926052 -3.02125616258487  
 H 2.72946544076310 2.47412749180372 -2.63421587437830  
 N 2.79041084489237 1.08826067085077 -1.07910914186501  
 H 3.50019255698858 1.63522965999056 -0.60415448749383  
 H 3.00958392416822 0.11103706447256 -0.90163744518573  
 N 1.42679037805306 1.40860784392553 1.60001151414046

H 0.62745453696811 1.16151218283448 2.17447687082823  
 H 2.14062464031812 0.70126097886003 1.74451698954145  
 C 1.90340494432364 2.76457699872886 1.92939802999887  
 H 2.92311093931154 2.86568383188182 1.54858529034870  
 H 1.92540568610043 2.94168197350157 3.00791216875878  
 C 0.99833060638267 3.77757609534867 1.24567946710204  
 H -0.02332182565802 3.66853698916471 1.61669701770775  
 H 1.33457374369026 4.79637929796095 1.45431539001280  
 N 0.97963396147150 3.49337745426296 -0.20663075748467  
 H 1.82358059976811 3.85531542553913 -0.64068215742292  
 H 0.20045141477853 3.96870573766043 -0.64989301470820  
 O -1.08559714972960 1.34827975227532 0.32442438160891  
 C -2.14118521276947 1.56790202276237 -0.30040515184571  
 H -2.13337793893097 1.80374227428578 -1.36999215689206  
 N -3.34321866223767 1.54066926817587 0.24466585360076  
 C -3.54101562044643 1.27867037742709 1.66377799909046  
 H -2.59016597249664 1.01654073104235 2.12092343407464  
 H -4.24775554471529 0.45478039975077 1.78355906108117  
 H -3.94998595086191 2.17025820744053 2.14570280718699  
 C -4.53774358806527 1.79057036465914 -0.55076062482421  
 H -4.25642468350612 1.98238126978110 -1.58590055013837  
 H -5.07127989555219 2.65734274907689 -0.15357374952186  
 H -5.19301107039600 0.91726125564181 -0.51047461203730  
 O 2.46588848497808 -1.31650125431340 0.82197790830730  
 C 1.95701063020721 -2.09547262882227 1.63500152309614  
 H 1.58693838680208 -1.74000721540579 2.60843988009572  
 N 1.78807856865717 -3.40547824014623 1.45439031062216  
 C 2.21299386484029 -4.07676255093620 0.23703564005906  
 H 2.75794853460323 -3.37563737929487 -0.39081077820672  
 H 1.34097955481445 -4.45230218850118 -0.30615739390206  
 H 2.86078104365973 -4.91884067518067 0.49307365216677  
 C 1.12676190443317 -4.22481249442896 2.45693963512039  
 H 0.85591092833813 -3.60820408820485 3.31418070871071  
 H 1.79454661994079 -5.02513266997695 2.78628398905047  
 H 0.22084938478580 -4.66975047207089 2.03569123947387  
 N 0.04938017220053 -1.66066997013267 -1.26572309640478  
 H 0.96786447523815 -1.63144663606890 -0.83516322067846  
 C -0.97210359287067 -2.04214486074464 -0.28761691114498  
 H 0.10128760677471 -2.35530255522847 -2.00365697225221  
 H -0.92057867472746 -1.34128144882252 0.55147373010917  
 H -0.82552407262953 -3.05505832495745 0.11579391222785  
 C -2.35635201786358 -1.96416438699165 -0.92682156916578  
 H -2.51655357053690 -0.95367260207430 -1.31494540023125  
 N -3.46523549742969 -2.30846448857078 -0.03477378159156  
 H -2.38916241721151 -2.63884070275117 -1.78969764244377  
 H -3.44277019198790 -1.71689433104126 0.78933687491739  
 H -3.35336769566339 -3.26084028247144 0.29820537674555

### <sup>3</sup>I<sub>2</sub>

Ni 0.43605228957073 0.98434816713819 -0.39386265208864  
 N 0.03823516270980 1.07123322966100 -2.48010649258032

H -0.80972899136278 0.58046249321971 -2.74284845050824  
 H -0.08500243711538 2.03391587633950 -2.77899297382472  
 C 1.20066187828921 0.48457582449073 -3.17486025983233  
 H 1.21814680396613 0.74635605489778 -4.23652625390201  
 H 1.12524547875884 -0.60322148008364 -3.10214716720822  
 C 2.47702517586736 0.95674788498475 -2.49938535235081  
 H 3.34845973740314 0.52308262010251 -2.99812448133635  
 H 2.55208609845826 2.04462585112876 -2.58019091925375  
 N 2.42598869114375 0.60925426676614 -1.06718441357120  
 H 3.12587103443693 1.13458341017226 -0.55465440289638  
 H 2.65832962665275 -0.36971779204437 -0.92983596244328  
 N 0.93937611506078 1.01318974467797 1.65628355069629  
 H 0.09136338168280 0.87302764571397 2.19580899636971  
 H 1.57752827783900 0.25556069552839 1.88434251262074  
 C 1.53656547206281 2.31980281624103 1.97685872903719  
 H 2.58110582935110 2.30108854058564 1.65307897585700  
 H 1.52334839934260 2.52895859008366 3.05058044350427  
 C 0.79021812616811 3.40680685929251 1.22230672537023  
 H -0.25595667742906 3.42211565396962 1.53655014219590  
 H 1.22592878604588 4.38640475112716 1.43953954448396  
 N 0.82489974304741 3.09186406529791 -0.21881889994236  
 H 1.74070509539638 3.32225255784922 -0.59241439049418  
 H 0.16588940038816 3.67738003450799 -0.72037354265611  
 O -1.57502474660277 1.37864560837502 0.19470452460021  
 C -2.36357390870654 2.11562582667484 -0.41808754470809  
 H -2.03601135366863 2.71700884683018 -1.27513981894758  
 N -3.64666502298400 2.25165341259039 -0.11925069992983  
 C -4.25702122847872 1.52075720723208 0.98149946592935  
 H -3.53866917697792 0.81248367529664 1.38669970075910  
 H -5.13498770553201 0.98390607109342 0.61515153184728  
 H -4.56835197973980 2.21855626474477 1.76328220659896  
 C -4.50117757688905 3.17031527381977 -0.85693606234956  
 H -3.92682912490917 3.65301109444942 -1.64751277832916  
 H -4.89476182582736 3.93430196195723 -0.18180981864243  
 H -5.33706159413723 2.62444686925251 -1.30073998400718  
 O 2.61386547200920 -1.48926574489787 1.37851846183347  
 C 2.96832190929208 -2.46087741682658 2.05679585839267  
 H 3.44376145836778 -2.32826038088705 3.03892067809604  
 N 2.83181790016372 -3.73527995454015 1.69607561771435  
 C 2.21537933364405 -4.09394921525228 0.42768411488770  
 H 2.35535940464664 -3.28606341345078 -0.28842109134255  
 H 1.14462918347149 -4.28090474509619 0.55463282706654  
 H 2.69101180233911 -4.99941849154039 0.04795727725646  
 C 3.20284707283900 -4.81959266679019 2.59218645127367  
 H 3.64236027218278 -4.40869344197019 3.50111635332155  
 H 3.93064714174037 -5.47343697968871 2.10570885051889  
 H 2.32039541680706 -5.40808246061500 2.85786073984237  
 N 0.10902849434400 -1.12888843351849 -0.30900265621992  
 H 0.87075703624373 -1.41898662470323 0.30234019739609  
 C -1.16046270711016 -1.66811491423021 0.20917716032537  
 H 0.30734182048049 -1.56828291976418 -1.20360436279801

H -1.47129400134750 -1.06793688767977 1.06606844287751  
H -1.02768829729969 -2.70271032118516 0.55033396955299  
C -2.24101602993360 -1.63426251975789 -0.85964682234572  
H -2.41547166995293 -0.60138275147919 -1.16596355843290  
N -3.49219980915189 -2.17718313390421 -0.32541268513152  
H -1.88028719103511 -2.18163328186072 -1.74400044696617  
H -3.39656902245771 -3.17555192003700 -0.16952446597155  
H -4.23473824356444 -2.06665085428917 -1.00668863921476

### <sup>3</sup>I<sub>3</sub>

Ni 0.42665169557001 0.99801175374765 -0.30707151668578  
N -0.14182528267556 1.00380549472531 -2.32679480876625  
H -0.98676593359771 0.42681553786948 -2.39057458252279  
H -0.36056870721633 1.93110070004796 -2.67455502969775  
C 0.96054724435909 0.42244230748626 -3.10970813241634  
H 0.88072901171117 0.66152581290817 -4.17419672652730  
H 0.91057558957751 -0.66571789152625 -3.01425683289307  
C 2.28681089424354 0.92431875337118 -2.56192984630505  
H 3.12083256224697 0.48945441013627 -3.12019319286866  
H 2.33904910739707 2.01069980678735 -2.67252931484601  
N 2.36154070299743 0.61048643864394 -1.12089469975975  
H 3.09342668863825 1.15790940944601 -0.68093961591376  
H 2.62570697046050 -0.36172287354243 -0.99429291786615  
N 1.07661159353007 1.09889668468984 1.71624549322630  
H 0.25277637205265 0.98699501798919 2.29935722773695  
H 1.72723630426983 0.37125833446184 1.99092631662029  
C 1.67653984880870 2.42624776883137 1.94534635253384  
H 2.69471522825625 2.40747336619266 1.54682571686598  
H 1.73609138492128 2.67313671702469 3.00926503840075  
C 0.85914377681487 3.47254706230415 1.20862496919641  
H -0.16250538699423 3.48217034294501 1.59490668020555  
H 1.29129452179949 4.46557694488730 1.36234916954200  
N 0.79948883697431 3.10763895901336 -0.21910644363215  
H 1.67824780509626 3.34886545141287 -0.66724006905243  
H 0.08723854129567 3.65416331230025 -0.69121648309740  
O -1.52722548585415 1.39346470161346 0.45596890021758  
C -2.41598174965232 1.97300337248162 -0.18805365184740  
H -2.19689859904845 2.48196109129899 -1.13406969371698  
N -3.68705708975127 2.03852918831786 0.17902217896851  
C -4.16550931830758 1.41219337026585 1.40250502059267  
H -3.34535448259487 0.88487600138301 1.88323514183610  
H -4.96488852898196 0.70738653047916 1.16173977869771  
H -4.55817725577813 2.17601648014991 2.07842108922632  
C -4.66933436718484 2.75333871024392 -0.62266550783586  
H -4.19014835256644 3.16806392637572 -1.50911613253641  
H -5.10722650483645 3.56562496014814 -0.03731874017419  
H -5.46402712167312 2.06918629463660 -0.92992520063237  
N 0.06157812598468 -1.12975516509931 -0.14845663711392  
H 0.66345094557470 -1.37972437393973 0.63030361997180  
C -1.27625259951659 -1.71677751191141 0.10368957002182  
H 0.46895223963189 -1.60786962440380 -0.94732027820424

H -1.85494257690875 -1.01481963055190 0.70680056988300  
H -1.16969759212097 -2.64294550567442 0.67726007790776  
C -2.02953011148547 -2.05541257821559 -1.17380528451397  
H -1.37891122494441 -2.64676198176119 -1.82690985292636  
N -2.46461067982495 -0.86732704345382 -1.91878261424815  
H -2.87299339705529 -2.70022674607620 -0.89519430012723  
H -3.19068718175817 -0.38946666007377 -1.39467387156132  
H -2.89828846188367 -1.15850342838721 -2.78853893336205

### <sup>3</sup>Tl<sub>2</sub>

Ni 1.17932344500874 -0.32491903537534 -0.33856399670443  
N 1.40393467539060 -0.36350020493382 -2.40634437271563  
H 0.71085522173578 -1.02281641409848 -2.75068833306430  
H 1.20416499269602 0.53332569092800 -2.83730039918647  
C 2.79060134513655 -0.76979911036788 -2.69063816837102  
H 3.08118353351222 -0.55404934026963 -3.72230320499273  
H 2.86938676334824 -1.84972312714969 -2.54216901151414  
C 3.71471422032688 -0.04781422136094 -1.72311513833448  
H 4.75271276680751 -0.35020675866752 -1.88358619603001  
H 3.64699883157861 1.03065437112658 -1.88783731636962  
N 3.27201744358387 -0.32192254584865 -0.33846117334091  
H 3.67683482796959 0.35693595460464 0.29755499846933  
H 3.61883705543198 -1.22841367579189 -0.03928217248723  
N 0.82579539353943 -0.11565134093067 1.70878261361274  
H -0.17097139711039 -0.26528866170643 1.84704361636375  
H 1.32020243204864 -0.78111536509713 2.29259327942122  
C 1.17923760872153 1.26499390766403 2.08440456252830  
H 2.26894222008176 1.34898707201391 2.07671072410037  
H 0.82759745497171 1.52040140065382 3.08819461906350  
C 0.57382168140369 2.21706444795304 1.06575041996707  
H -0.51275158615353 2.19690778271254 1.14464609825067  
H 0.90572176202845 3.23961626785640 1.26100052272394  
N 0.93906164001638 1.77479890925612 -0.29650350920508  
H 1.81864897040779 2.19906650350542 -0.57400649972737  
H 0.24905794562188 2.09712166998290 -0.96674923267473  
O -1.91069797112911 -0.01952774141917 0.56289456330044  
C -2.77000406371552 0.85428344713970 0.40920730694496  
H -3.18548223147754 1.07604158729040 -0.58462699152885  
N -3.28294116931843 1.61482204780538 1.37683700240856  
C -2.87598659830332 1.47026034954705 2.76525950427027  
H -2.22155537491924 0.60732675731220 2.86427631621905  
H -3.76047084219190 1.32904634955664 3.39124110581947  
H -2.34801193761254 2.36828455732145 3.09840497413650  
C -4.27679853684217 2.63638558081137 1.08740274635701  
H -4.49661369791274 2.64316692232158 0.01973033452062  
H -3.89996526331988 3.61971596259750 1.38119398863700  
H -5.19654163516181 2.43091322688730 1.64132053719723  
N 1.02600910228231 -2.42462858467215 -0.21243682833963  
H 1.60088372262328 -2.67350124360326 0.58745546009813  
C -0.31798011622108 -3.01909988207094 -0.02473487687947  
H 1.46748769023611 -2.87811287452733 -1.00791064183643



H -0.85376478324972 -2.42202927145409 0.71654522377003  
H -0.23039105573337 -4.03786537445949 0.36485335353883  
C -1.10386766090770 -3.06595275069043 -1.32406576970573  
H -0.56413903024070 -3.68872984578140 -2.04656444983837  
N -1.27816997588982 -1.73011283817230 -1.89726229183407  
H -2.05558503924699 -3.57170180654082 -1.11127567883068  
H -1.73074552306391 -1.12571033117491 -1.21610080706655  
H -1.88059725678818 -1.77792842068367 -2.71077681114114

### <sup>3</sup>I<sub>4</sub>

Ni 0.17676454326893 0.93754575387278 -0.14703142825417  
N -0.47008589836843 1.19374864703353 -2.17183589378653  
H -1.22152620312504 0.56889610839257 -2.44166800087218  
H -0.84444700471953 2.13349793269421 -2.26639182144786  
C 0.69008505515682 0.99007067556060 -3.05633577841118  
H 0.53456739595854 1.42121989314086 -4.04971406609120  
H 0.83408290841260 -0.08719394556561 -3.17833649762336  
C 1.92647844438669 1.59427642300374 -2.41409871986561  
H 2.79869063010805 1.43174908339749 -3.05418110701926  
H 1.79352324086255 2.67302317997312 -2.29835266503205  
N 2.10523831639603 1.01005573601868 -1.07199809378186  
H 2.79236867960916 1.54211035774509 -0.54914110601486  
H 2.47729240319961 0.06880814237904 -1.15452124593016  
N 1.00288023404228 0.86646236910244 1.82999830430641  
H 0.32587595433338 0.50611008566278 2.49486755451148  
H 1.80850622019441 0.25291901130607 1.88586637128789  
C 1.38187988375238 2.24296871496762 2.20239066668114  
H 2.33364836420631 2.47400781383698 1.71684114239417  
H 1.52052902319294 2.35360533720768 3.28175424805328  
C 0.31205342677049 3.20078188571837 1.70612228367553  
H -0.64401512430785 2.96183095931083 2.17921261493234  
H 0.57042349996377 4.22852588726767 1.97794701480156  
N 0.15594233476372 3.03154719362969 0.25177949257564  
H 0.88749997986153 3.53914707129060 -0.23401366696165  
H -0.73283093254769 3.40874386199335 -0.06642381927590  
O -2.52569391322223 3.28737425763440 -1.14428140053742  
C -3.44226296786698 4.11155238865984 -1.23478268535060  
H -3.78285345907641 4.47722898156371 -2.21396323715545  
N -4.10928145654378 4.64495687305013 -0.21183231648978  
C -3.81689927669746 4.29072428228363 1.16725378980233  
H -2.96050306018274 3.62180437016058 1.20023640291758  
H -4.68219315154806 3.79511776849048 1.61607995240567  
H -3.59402045700378 5.19496681279735 1.73934934512979  
C -5.18704763213396 5.59717031414631 -0.42825967622870  
H -5.30959580817531 5.77836762606220 -1.49610595799933  
H -4.95703619434652 6.54211634779992 0.07086498998325  
H -6.12282016655765 5.20284568347331 -0.02310116355344  
N 0.02664618401075 -1.19517879948322 -0.26077960722815  
H 0.85063107055768 -1.66200443621600 0.10237841229974  
C -1.16481690858441 -1.58739965418711 0.51621181070466  
H -0.07471393183697 -1.50503752556033 -1.22233417207148

H -0.90629199035025 -1.53543943692985 1.57707640988181  
H -1.48057048911076 -2.61151278534260 0.29659811888551  
C -2.29278212650093 -0.61385354198094 0.21722557512182  
H -2.54604404959064 -0.66069917527204 -0.84508150122698  
N -1.84033780512499 0.75369726483208 0.52350629079869  
H -3.18721193272520 -0.88962143282069 0.78341597284135  
H -1.94136180886480 0.93554361805546 1.51641526369833  
H -2.40093404389615 1.44877201984296 0.03839360051919

### <sup>3</sup>P<sub>1</sub>

Ni 0.00025347306572 -0.00393346607394 -0.00207178459046  
N 0.04981406707459 -0.00604877340199 2.13623849705514  
H -0.55316748594505 -0.71905328796620 2.53226459147781  
H 0.98440945315412 -0.20059158643825 2.48191334237683  
N -0.07868587958505 2.11508321370831 0.29780083648707  
H 0.55611798967312 2.60501787828736 -0.32331232354947  
H -1.00406776429671 2.48507490534204 0.10485011371978  
N 2.13597821709204 0.01572920032542 -0.15932959258777  
H 2.39877154110028 0.30407567463135 -1.09675902628200  
H 2.59077745798798 0.66519660500990 0.47303867197801  
C -0.37750038453501 1.33175266431370 2.58700900799109  
H -0.12894025391142 1.51197719103764 3.63683935502209  
H -1.46430982046939 1.39021610138882 2.48453162237213  
C 0.27730528401793 2.38049437940410 1.70498648598202  
H -0.02235532852570 3.38317294795474 2.02278576511865  
H 1.36421540680523 2.31180369499266 1.79845793560501  
C 2.61707980027709 -1.35533501961142 0.09205818987124  
H 2.59181854081961 -1.52936998689060 1.17122202834599  
H 3.64717316161539 -1.49943873239397 -0.24633851340980  
N 0.31339863608677 -2.11738903342757 -0.13628614540638  
H 0.19389223202472 -2.52816728327946 0.78485819213199  
H -0.34151099043231 -2.59532506544005 -0.74549158485802  
C 1.69414554223871 -2.33883301332431 -0.60505830219722  
H 1.71670446917109 -2.16284147438990 -1.68397989808685  
H 2.03082485227160 -3.36399725629652 -0.42591055949726  
N -0.28697067114110 0.19624797712668 -2.11184366022718  
H 0.27977081296906 0.93789074058214 -2.50891046284542  
H -0.02561937910352 -0.65389464763710 -2.60163609277744  
N -2.12936608103877 -0.22379307917521 -0.03368912051996  
H -2.43727544486862 -0.99854129822433 0.54391007997040  
H -2.58918326524331 0.60305317915393 0.33416805372429  
C -1.71859539156811 0.47358413077262 -2.33315760092077  
H -2.00859803978204 0.33409407906068 -3.37857692188968  
H -1.90432464500248 1.51812968643823 -2.06950771391175  
C -2.53879977966167 -0.43597047169882 -1.43514238250361  
H -3.60664814207183 -0.25255142493682 -1.58389267957638  
H -2.34031219026295 -1.47986934892390 -1.69169840359210
